# Supplementary material for: How Psychological Stress Affects Emotional Prosody
Source: PLoS One. 2016 Nov 1;11(11):e0165022. doi: 10.1371/journal.pone.0165022 (PMC5089770; doi:10.1371/journal.pone.0165022)
Supplement: S1 Dataset — Sheet 1 is called Acoustic Data and contains all variables analyzed for materials generated for Studies 1a, b, and 2. Sheet 2 is called Study 1a and contains all relevant data obtained for Study 1a. Sheets 2 (called Study 1b) and 3 (called Study 2) contain data for Studies 1b and 2. (XLSX) [file pone.0165022.s001.xlsx]

## Sheet: AcousticData
Filename	Speaker	Sex	Condition (P=Speaker Primed with Stress, N = Not primed)	emotion	emoCod	meanFO	SD_F0	MaxF0	MinF0	meanAmp	SD_Amp	MaxAmp	MinAmp	Duration	rangeF0	rangeAmp	Non-stressedListenersEmotionAccuracy	StressedListenersEmotionAccuracy	bothListenerGroupsEmotionAccuracy	StressRating	StressAccuracy
ang01_01P	01P	f	P	ang	1	232.497	32.8407	291.5	180.102	50.1327	11.9569	71.5173	22.7366	1.43181	111.398	48.7808	0.380952	0.55	0.463415	2.64516	0.409091
ang01_09P	09P	f	P	ang	1	216.028	39.4507	278.211	132.259	55.1373	11.2687	72.8575	19.6804	1.71968	145.952	53.177	0.380952	0.3	0.341463	3.19355	0.439394
ang01_10N	10N	f	N	ang	1	219.979	59.0733	355.783	147.798	57.5799	10.2252	74.9405	19.6309	1.73909	207.985	55.3096	0.619048	0.35	0.487805	2.51613	0.409091
ang02_01P	01P	f	P	ang	1	257.697	49.3334	432.942	173.429	54.131	11.3922	73.7859	20.5544	1.48662	259.513	53.2315	0.47619	0.5	0.487805	3.80645	0.469697
ang02_09P	09P	f	P	ang	1	268.12	83.5227	538.388	134.604	57.7116	9.52914	75.01	24.8202	1.83406	403.784	50.1898	0.047619	0.05	0.0487805	3.41935	0.242424
ang02_11N	11N	f	N	ang	1	202.257	26.3104	255.876	169.915	60.0583	10.7732	76.6751	22.2122	1.52857	85.9606	54.4629	0.952381	0.95	0.95122	3.64516	0.893939
ang03_01P	01P	f	P	ang	1	236.771	38.8057	328.613	185.49	51.1367	13.9043	70.418	21.3995	1.21696	143.122	49.0185	0.571429	0.6	0.585366	3.22581	0.590909
ang03_06N	06N	f	N	ang	1	227.47	51.3842	360.119	169.115	51.8075	12.8688	73.6563	19.9688	1.44224	191.004	53.6875	0.904762	0.8	0.853659	4.12903	0.893939
ang03_08N	08N	f	N	ang	1	211.736	66.7838	481.86	157.44	51.51	14.677	72.8567	19.8698	1.23388	324.419	52.9869	0.619048	0.45	0.536585	2.41935	0.712121
ang03_09P	09P	f	P	ang	1	247.761	89.7538	580.672	137.703	54.8461	9.94682	70.2755	23.9243	1.36098	442.969	46.3512	0.714286	0.5	0.609756	3.12903	0.560606
ang03_11N	11N	f	N	ang	1	223.508	69.0436	438.672	168.635	58.6954	13.1483	78.8476	23.9769	1.069	270.037	54.8707	1	0.9	0.95122	3.6129	0.924242
ang04_01P	01P	f	P	ang	1	230.66	31.918	290.866	183.381	55.803	10.8644	70.9974	27.2371	1.17658	107.485	43.7603	0.380952	0.45	0.414634	3.19355	0.469697
ang04_05P	05P	f	P	ang	1	229.451	28.8575	285.353	182.373	61.5535	6.5856	74.8976	35.3001	1.17986	102.98	39.5975	0.809524	0.8	0.804878	3.19355	0.666667
ang05_06N	06N	f	N	ang	1	243.653	59.3604	398.962	167.063	56.9124	9.58433	77.0167	26.2395	1.47401	231.899	50.7772	0.714286	0.7	0.707317	3.54839	0.863636
ang05_09P	09P	f	P	ang	1	252.112	66.9589	410.156	139.338	59.4302	9.80352	75.1261	24.3332	1.30048	270.818	50.7929	0.380952	0.3	0.341463	3.74194	0.439394
ang05_11N	11N	f	N	ang	1	217.024	48.8957	314.9	161.163	61.7393	11.9836	85.5626	17.8152	1.36649	153.736	67.7474	0.952381	0.7	0.829268	3.54839	0.848485
ang06_06N	06N	f	N	ang	1	240.465	31.9321	310.386	170.219	53.7065	14.6479	75.7523	20.2553	1.27211	140.167	55.497	0.904762	0.9	0.902439	3.93548	0.893939
ang07_05P	05P	f	P	ang	1	225.478	57.3432	534.905	177.573	58.6805	10.2352	75.7222	23.3231	1.86281	357.332	52.399	0.761905	0.75	0.756098	2.77419	0.590909
ang07_11N	11N	f	N	ang	1	219.112	71.9222	539.937	159.47	60.5184	8.86195	77.4508	32.4643	1.5827	380.467	44.9865	1	0.95	0.97561	3.41935	0.909091
ang08_01P	01P	f	P	ang	1	260.903	59.2679	432.084	184.942	53.3671	10.3697	74.7419	20.6826	2.01676	247.142	54.0593	0.52381	0.3	0.414634	2.87097	0.393939
ang08_05P	05P	f	P	ang	1	223.695	37.6335	448.083	171.164	55.2714	12.0925	76.9386	17.8482	2.24794	276.918	59.0904	0.666667	0.65	0.658537	3.25806	0.69697
ang08_08N	08N	f	N	ang	1	193.518	30.9344	262.345	156.371	54.9812	10.4337	74.7184	20.0398	1.90408	105.974	54.6786	0.47619	0.3	0.390244	2.64516	0.5
ang09_05P	05P	f	P	ang	1	226.788	25.8668	275.141	165.816	55.5262	11.2541	75.0478	23.1574	1.79823	109.324	51.8904	0.666667	0.35	0.512195	3.48387	0.469697
ang09_11N	11N	f	N	ang	1	198.39	32.2823	265.711	149.069	57.9861	9.28945	71.2522	22.3293	1.5102	116.642	48.9229	0.761905	0.8	0.780488	3.67742	0.848485
ang10_01P	01P	f	P	ang	1	292.745	58.6426	400.192	183.773	59.5749	13.1138	78.3162	22.2922	1.42383	216.42	56.024	0.761905	0.65	0.707317	3.48387	0.80303
ang10_05P	05P	f	P	ang	1	231.578	33.1035	386.675	166.266	57.0197	12.6928	77.5543	19.5913	1.67324	220.409	57.963	0.761905	0.55	0.658537	2.74194	0.636364
ang10_08N	08N	f	N	ang	1	202.405	27.3048	256.566	164.6	58.4098	11.3742	75.8792	21.5702	1.56812	91.9658	54.309	0.571429	0.6	0.585366	2.87097	0.712121
ang10_11N	11N	f	N	ang	1	233.788	63.2321	461.135	172.51	61.663	9.21471	77.276	21.9422	1.62782	288.625	55.3338	0.904762	0.8	0.853659	3.93548	0.878788
ang11_01P	01P	f	P	ang	1	277.072	63.4196	383.345	192.264	55.8585	11.6087	74.2895	22.7434	1.30787	191.081	51.546	0.857143	0.75	0.804878	3.70968	0.878788
ang11_11N	11N	f	N	ang	1	208.375	29.4382	275.165	166.175	57.7792	11.1031	72.4876	25.1894	1.40798	108.99	47.2982	0.952381	0.6	0.780488	3.67742	0.80303
ang12_05P	05P	f	P	ang	1	219.081	38.4986	468.511	178.235	57.5719	11.3971	73.6755	23.1075	1.52438	290.276	50.568	0.904762	0.85	0.878049	3.74194	0.833333
ang13_08N	08N	f	N	ang	1	205.666	48.9363	392.718	156.864	52.5245	11.2007	71.6189	19.8923	1.46914	235.854	51.7266	0.238095	0.2	0.219512	2.48387	0.469697
ang13_09P	09P	f	P	ang	1	277.584	97.7041	559.873	139.656	54.2085	11.2385	72.8362	18.3123	1.57989	420.216	54.5239	0.0952381	0.05	0.0731707	3.12903	0.212121
ang13_11N	11N	f	N	ang	1	214.901	80.1862	525.318	163.492	57.8067	9.89681	82.2071	18.5753	1.34442	361.826	63.6317	0.952381	0.8	0.878049	3.74194	0.939394
ang14_05P	05P	f	P	ang	1	245.621	66.1089	556.165	189.911	56.4589	11.7844	77.2718	24.7204	1.47757	366.254	52.5514	0.952381	0.75	0.853659	3.35484	0.787879
ang14_10N	10N	f	N	ang	1	248.867	61.9046	486.889	146.462	57.9361	8.1157	75.4412	28.3252	1.11009	340.427	47.1159	0.333333	0.3	0.317073	3.29032	0.409091
ang14_11N	11N	f	N	ang	1	224.838	60.8167	476.65	143.154	59.4643	9.62548	75.8238	18.8252	1.24447	333.496	56.9986	1	0.95	0.97561	3.6129	0.863636
ang15_01P	01P	f	P	ang	1	273.814	56.0339	370.33	183.203	61.5837	12.124	76.4344	20.4323	1.28506	187.127	56.0021	0.904762	0.65	0.780488	3.87097	0.909091
ang15_08N	08N	f	N	ang	1	213.888	57.7669	515.149	156.321	59.9611	9.33928	72.4934	27.5711	1.53213	358.828	44.9223	0.47619	0.15	0.317073	1.77419	0.393939
ang15_11N	11N	f	N	ang	1	226.683	107.476	611.213	160.307	60.6654	11.4097	80.1837	19.0437	1.28694	450.906	61.14	1	0.95	0.97561	3.22581	0.939394
dis01_03P	03P	f	P	dis	2	206.345	26.771	267.266	178.083	43.5523	10.1187	56.5988	16.237	1.7042	89.1829	40.3618	0.571429	0.65	0.609756	1.41935	0.378788
dis01_05P	05P	f	P	dis	2	201.346	26.1398	254.589	166.585	50.8328	8.10154	64.9379	29.2379	1.68594	88.0038	35.7	0.714286	0.5	0.609756	1.19355	0.590909
dis01_06N	06N	f	N	dis	2	195.588	27.489	253.039	154.417	45.2036	11.1219	64.1443	17.4402	2.08401	98.622	46.7041	0.619048	0.75	0.682927	1.6129	0.80303
dis01_10N	10N	f	N	dis	2	196.072	39.5601	302.704	149.742	46.2199	10.0182	65.9899	21.2573	2.40166	152.963	44.7326	0.571429	0.6	0.585366	0.451613	0.606061
dis02_05P	05P	f	P	dis	2	219.047	17.2269	276.381	196.479	52.8265	9.58416	69.6641	29.5763	1.68279	79.9023	40.0879	0.857143	0.85	0.853659	2	0.712121
dis02_06N	06N	f	N	dis	2	222.158	60.9037	496.568	166.232	45.4268	12.7663	67.0954	17.3383	1.90467	330.336	49.7571	0.761905	0.6	0.682927	1.80645	0.787879
dis02_10N	10N	f	N	dis	2	255.344	111.503	563.827	137.507	48.7833	9.95527	68.5325	21.2506	1.92385	426.319	47.2818	0.142857	0.1	0.121951	0.258065	0.121212
dis03_10N	10N	f	N	dis	2	225.622	75.0664	487.635	136.387	44.0494	12.7337	65.764	17.643	1.87118	351.249	48.121	0.619048	0.4	0.512195	0.580645	0.515152
dis04_06N	06N	f	N	dis	2	282.025	108.305	599.407	186.712	48.1288	6.64482	62.9362	28.2428	1.53927	412.696	34.6935	0.380952	0.35	0.365854	0.516129	0.30303
dis05_01P	01P	f	P	dis	2	215.794	35.4253	283.395	155.732	49.1453	9.98691	65.9916	19.6111	1.63449	127.663	46.3804	0.52381	0.45	0.487805	1.19355	0.575758
dis05_05P	05P	f	P	dis	2	235.256	65.8486	554.913	196.238	53.4215	7.76704	67.392	29.4165	1.59757	358.674	37.9755	0.714286	0.45	0.585366	1.3871	0.469697
dis05_06N	06N	f	N	dis	2	209.906	51.5345	447.37	168.479	42.7936	9.9197	60.1945	21.4709	1.58619	278.891	38.7236	0.52381	0.45	0.487805	0.806452	0.606061
dis05_10N	10N	f	N	dis	2	248.301	86.0833	476.158	145.856	48.2876	10.05	69.9764	18.903	2.0293	330.302	51.0734	0.142857	0.3	0.219512	0.483871	0.333333
dis06_03P	03P	f	P	dis	2	195.796	29.5935	250.909	153.218	45.2183	9.16134	58.9237	21.5271	1.68633	97.6916	37.3966	0.571429	0.6	0.585366	1.03226	0.439394
dis06_09P	09P	f	P	dis	2	212.244	43.7759	295.385	146.493	52.8319	8.99731	63.5931	22.3437	1.772	148.892	41.2494	0.285714	0.45	0.365854	1.48387	0.439394
dis06_10N	10N	f	N	dis	2	233.27	72.5566	458.326	151.17	50.1054	8.82807	62.6742	29.9767	1.61594	307.157	32.6975	0.47619	0.4	0.439024	0.741935	0.545455
dis07_03P	03P	f	P	dis	2	188.423	48.5993	508.956	159.406	44.4148	8.13943	58.3457	20.7892	1.8173	349.551	37.5565	0.333333	0.15	0.243902	0.935484	0.19697
dis07_05P	05P	f	P	dis	2	181.73	15.7049	231.114	160.178	50.6272	10.1953	67.1529	24.8903	1.81093	70.936	42.2626	0.285714	0.25	0.268293	1.74194	0.348485
dis07_07P	07P	f	P	dis	2	232.353	56.9132	533.701	203.401	49.5514	10.2265	62.4735	21.189	1.65478	330.3	41.2844	0.0952381	0.1	0.097561	1.90323	0.0454545
dis07_08N	08N	f	N	dis	2	196.728	72.3719	606.969	150.131	52.5822	7.92718	66.1238	27.4524	1.97449	456.838	38.6714	0.761905	0.5	0.634146	1.77419	0.424242
dis07_09P	09P	f	P	dis	2	223.345	48.6419	367.988	128.405	53.9128	7.1605	62.9772	26.3159	1.99163	239.583	36.6613	0.285714	0.3	0.292683	1.67742	0.287879
dis07_10N	10N	f	N	dis	2	221.299	73.6162	578.908	131.739	51.3825	9.39548	68.3405	22.0334	2.00265	447.169	46.3071	0.142857	0.15	0.146341	0.774194	0.121212
dis08_01P	01P	f	P	dis	2	205.673	36.387	304.292	161.765	48.3125	10.6004	67.7494	19.0248	2.39995	142.527	48.7245	0.333333	0.45	0.390244	1.58065	0.30303
dis08_03P	03P	f	P	dis	2	205.075	57.6699	504.781	154.203	45.1016	9.24975	62.9253	20.7498	2.15363	350.578	42.1755	0.047619	0	0.0243902	1	0.0606061
dis08_08N	08N	f	N	dis	2	201.947	50.981	456.739	159.726	50.3409	11.792	70.451	16.855	2.33683	297.012	53.596	0.238095	0.3	0.268293	0.935484	0.272727
dis09_06N	06N	f	N	dis	2	212.134	63.2308	567.004	166.413	42.7358	10.8761	59.6367	17.1478	1.80839	400.59	42.4889	0.619048	0.6	0.609756	2.06452	0.681818
dis09_07P	07P	f	P	dis	2	251.899	67.6842	429.428	172.918	48.1546	8.98149	67.3569	24.4575	1.67902	256.51	42.8994	0.190476	0.15	0.170732	1.87097	0.106061
dis10_03P	03P	f	P	dis	2	214.783	65.7736	487.198	179.026	46.7769	9.26201	58.9405	19.6942	1.86218	308.173	39.2462	0.190476	0.25	0.219512	1.64516	0.136364
dis10_08N	08N	f	N	dis	2	223.518	64.9564	551.071	170.364	52.4424	11.9914	70.167	19.0574	2.02379	380.707	51.1096	0.428571	0.45	0.439024	1.54839	0.484848
dis10_09P	09P	f	P	dis	2	248.094	49.2679	502.902	136.327	53.217	13.3805	70.717	17.7419	2.38043	366.575	52.9751	0.52381	0.25	0.390244	2.35484	0.333333
dis11_08N	08N	f	N	dis	2	234.54	53.1743	420.189	164.529	55.5324	8.62543	68.4287	32.1479	1.84798	255.659	36.2808	0.190476	0.05	0.121951	1.6129	0.19697
dis11_10N	10N	f	N	dis	2	242.975	81.122	459.828	168.63	48.7462	8.41018	66.8883	18.1863	1.88896	291.198	48.7021	0.380952	0.2	0.292683	1.16129	0.257576
dis12_10N	10N	f	N	dis	2	228.876	76.5858	631.297	183.294	47.8048	10.3493	62.9088	18.9855	1.95104	448.004	43.9233	0.47619	0.2	0.341463	0.709677	0.393939
dis13_03P	03P	f	P	dis	2	239.804	73.475	479.191	174.026	43.2874	10.5275	62.9329	17.5687	1.63447	305.165	45.3642	0.714286	0.65	0.682927	1.6129	0.69697
dis13_09P	09P	f	P	dis	2	231.941	40.3872	296.452	151.892	47.0226	11.2599	62.9161	17.7516	1.65968	144.56	45.1645	0.857143	0.65	0.756098	1.48387	0.590909
dis13_10N	10N	f	N	dis	2	217.402	60.9635	479.093	153.158	41.786	10.3162	61.8062	20.5804	2.05014	325.935	41.2258	0.761905	0.7	0.731707	0.83871	0.681818
dis14_05P	05P	f	P	dis	2	223.438	68.7685	566.503	163.564	53.4348	6.41965	71.1569	36.871	1.77032	402.939	34.2859	0.47619	0.5	0.487805	1.87097	0.439394
dis15_03P	03P	f	P	dis	2	227.803	89.2878	580.987	155.621	47.1837	9.33561	61.4758	21.8249	1.84753	425.366	39.6509	0.428571	0.15	0.292683	1.41935	0.409091
dis15_06N	06N	f	N	dis	2	230.913	110.095	623.169	162.515	46.9124	8.70339	58.2056	19.6455	1.58766	460.654	38.56	0.761905	0.7	0.731707	1.09677	0.681818
dis15_10N	10N	f	N	dis	2	231.528	61.2691	454.846	139.015	51.2465	9.91381	66.3817	26.4391	1.60286	315.832	39.9425	0.52381	0.4	0.463415	0.806452	0.469697
fea01_08N	08N	f	N	fea	3	298.06	47.3981	371.152	213.508	51.6186	11.9872	67.1423	19.3476	1.59488	157.644	47.7947	0.666667	0.45	0.560976	2.51613	0.590909
fea01_10N	10N	f	N	fea	3	317.46	69.3477	420.741	165.616	53.3478	10.16	67.7985	19.0488	1.73642	255.125	48.7498	0	0.15	0.0731707	1.67742	0.0606061
fea02_01P	01P	f	P	fea	3	349.216	55.0743	436.925	196.525	52.7399	11.912	68.7179	21.1542	1.43692	240.4	47.5637	0.380952	0.25	0.317073	2.58065	0.30303
fea02_05P	05P	f	P	fea	3	256.515	30.9965	298.243	204.097	56.4065	9.07027	69.7453	33.0137	1.45605	94.1459	36.7316	0.380952	0.4	0.390244	3.19355	0.227273
fea02_08N	08N	f	N	fea	3	316.183	62.7823	400.046	218.237	53.9754	12.3557	71.4873	18.8496	1.489	181.809	52.6377	0.761905	0.55	0.658537	2.96774	0.530303
fea02_11N	11N	f	N	fea	3	232.213	31.7429	285.43	190.739	57.3023	9.87264	71.054	19.2807	1.59098	94.6905	51.7733	0	0.1	0.0487805	2.67742	0.0151515
fea03_06N	06N	f	N	fea	3	299.954	57.0345	366.325	169.267	51.676	12.8933	66.0589	22.1671	1.46748	197.058	43.8918	0.285714	0.25	0.268293	1.09677	0.121212
fea03_08N	08N	f	N	fea	3	299.805	57.4344	406.067	221.138	49.6053	13.9199	72.7966	16.3284	1.2402	184.929	56.4681	0.428571	0.4	0.414634	2.45161	0.484848
fea04_06N	06N	f	N	fea	3	303.833	27.4105	369.927	263.367	52.0473	7.85194	62.0029	23.7628	1.4122	106.56	38.2401	0.238095	0.3	0.268293	2.3871	0.272727
fea04_08N	08N	f	N	fea	3	300.541	41.3045	390.812	175.62	51.9174	8.35322	63.233	26.4686	1.33011	215.192	36.7645	0.571429	0.5	0.536585	3.22581	0.454545
fea05_05P	05P	f	P	fea	3	253.111	27.0343	294.824	199.797	53.9324	11.1305	72.0346	26.0392	1.71839	95.0265	45.9954	0.52381	0.75	0.634146	3.09677	0.469697
fea05_06N	06N	f	N	fea	3	306.559	51.3174	391.335	158.567	54.5904	8.65299	68.2443	25.9513	1.57068	232.768	42.2931	0.619048	0.7	0.658537	2.22581	0.590909
fea05_08N	08N	f	N	fea	3	287.1	40.024	360.266	234.425	51.9719	10.9162	69.4409	18.1845	1.69497	125.842	51.2564	0.666667	0.7	0.682927	3.16129	0.666667
fea06_05P	05P	f	P	fea	3	260.132	26.6791	301.548	207.558	55.7399	9.31483	70.7503	29.766	1.45422	93.99	40.9843	0.333333	0.4	0.365854	2.6129	0.333333
fea06_08N	08N	f	N	fea	3	304.831	45.9776	434.554	241.591	55.4809	8.70391	73.6677	23.3038	1.39125	192.963	50.3639	0.571429	0.55	0.560976	2.67742	0.5
fea06_09P	09P	f	P	fea	3	266.61	68.4049	396.916	153.611	59.0932	7.95128	71.9364	37.4685	1.48134	243.305	34.468	0	0.1	0.0487805	3.64516	0.0757576
fea07_01P	01P	f	P	fea	3	280.679	56.3175	384.09	163.403	50.3765	9.55884	67.6927	27.449	1.6598	220.687	40.2436	0.761905	0.55	0.658537	3.64516	0.590909
fea07_05P	05P	f	P	fea	3	295.089	49.8456	510.968	252.644	57.8055	8.72173	71.1595	32.6172	1.71111	258.324	38.5423	0.285714	0.2	0.243902	3.80645	0.272727
fea07_06N	06N	f	N	fea	3	282.465	29.561	348.075	157.381	51.3448	10.4643	64.5216	18.6789	1.98778	190.695	45.8428	0.333333	0.3	0.317073	2.70968	0.515152
fea07_08N	08N	f	N	fea	3	292.306	55.6718	404.896	185.629	52.6725	9.56725	67.112	30.0669	1.62689	219.267	37.0451	0.666667	0.6	0.634146	2.93548	0.530303
fea07_09P	09P	f	P	fea	3	285.819	52.5707	349.688	151.335	60.002	6.69425	71.4735	34.7058	1.70937	198.353	36.7678	0	0	0	2.80645	0.0606061
fea08_01P	01P	f	P	fea	3	285.88	45.0362	372.395	196.168	49.418	9.38413	68.908	26.2717	2.05961	176.227	42.6363	0.428571	0.4	0.414634	2.96774	0.439394
fea08_06N	06N	f	N	fea	3	298.011	42.7897	383.475	216.291	53.6375	9.37101	67.7007	23.2681	2.22551	167.184	44.4327	0.285714	0.2	0.243902	2	0.424242
fea09_01P	01P	f	P	fea	3	275.748	57.1293	362.621	151.066	49.451	10.0756	66.9482	25.5727	1.52177	211.555	41.3755	0.619048	0.45	0.536585	2.54839	0.348485
fea09_06N	06N	f	N	fea	3	303.852	33.6004	393.881	249.241	49.0089	10.0598	62.5741	22.7953	1.63073	144.64	39.7788	0.142857	0.25	0.195122	2.3871	0.287879
fea09_11N	11N	f	N	fea	3	233.553	30.6097	299.184	182.311	56.4508	8.55557	70.2114	22.7792	1.45544	116.873	47.4323	0.238095	0.25	0.243902	2.64516	0.106061
fea10_01P	01P	f	P	fea	3	289.652	31.4855	346.365	237.949	50.9274	10.4166	68.9765	25.0415	1.4302	108.416	43.935	0.47619	0.5	0.487805	2.77419	0.469697
fea10_06N	06N	f	N	fea	3	322.838	57.2022	525.691	201.526	53.1291	10.03	67.8671	20.8331	1.99773	324.165	47.034	0.380952	0.4	0.390244	2.03226	0.363636
fea10_08N	08N	f	N	fea	3	317.774	40.1294	399.973	230.87	56.2179	10.649	76.3079	21.7076	1.63206	169.103	54.6004	0.952381	0.75	0.853659	3.03226	0.742424
fea11_01P	01P	f	P	fea	3	280.708	26.7094	315.194	229.285	48.1817	10.5732	62.6693	21.9945	1.37458	85.9089	40.6748	0.380952	0.5	0.439024	3.06452	0.333333
fea11_09P	09P	f	P	fea	3	277.6	77.2931	385.08	147.938	60.2624	8.19035	73.8069	40.9365	1.29252	237.142	32.8704	0	0	0	3.25806	0.0606061
fea12_01P	01P	f	P	fea	3	299.108	48.5528	360.99	217.681	46.55	11.8223	64.3809	21.2209	1.46111	143.309	43.16	0.285714	0.05	0.170732	2.87097	0.166667
fea12_05P	05P	f	P	fea	3	269.501	29.5592	303.512	199.865	57.0015	10.2966	71.187	27.0079	1.49884	103.647	44.1791	0.428571	0.45	0.439024	3.93548	0.19697
fea13_08N	08N	f	N	fea	3	280.79	47.6214	360.493	163.429	51.8115	9.94515	70.1756	26.615	1.44315	197.064	43.5606	0.666667	0.65	0.658537	3.09677	0.666667
fea14_01P	01P	f	P	fea	3	299.723	36.5927	353.285	237.719	47.4108	10.0208	62.6355	22.264	1.38002	115.566	40.3716	0.333333	0.25	0.292683	2.77419	0.439394
fea14_06N	06N	f	N	fea	3	308.325	47.9442	458.178	157.354	50.5995	9.67112	63.165	20.6314	1.6785	300.824	42.5336	0.666667	0.55	0.609756	2.58065	0.424242
fea14_07P	07P	f	P	fea	3	273.063	74.4196	528.097	218.81	49.4897	8.80359	60.6407	26.6542	1.26159	309.286	33.9865	0.047619	0	0.0243902	2.09677	0.0454545
fea15_01P	01P	f	P	fea	3	293.627	41.6276	345.361	218.399	51.9051	10.4708	65.2167	25.6787	1.29909	126.962	39.5381	0.47619	0.55	0.512195	2.77419	0.530303
fea15_03P	03P	f	P	fea	3	271.128	60.9813	514.435	200.814	46.8515	9.95537	64.2126	20.937	1.54769	313.62	43.2756	0.0952381	0.05	0.0731707	1.3871	0.0606061
fea15_05P	05P	f	P	fea	3	287.047	46.6515	470.255	221.993	61.0417	7.55853	74.272	43.7872	1.5078	248.262	30.4848	0.714286	0.75	0.731707	3.74194	0.333333
hap01_03P	03P	f	P	hap	4	266.341	76.3209	429.726	180.822	46.295	10.7314	62.8171	20.3072	1.27805	248.904	42.5099	0.857143	0.65	0.756098	0.258065	0.712121
hap01_05P	05P	f	P	hap	4	251.921	47.4404	412.432	191.943	54.3594	9.82246	69.5104	27.9975	1.65723	220.489	41.5129	0.0952381	0.15	0.121951	1	0.106061
hap01_08N	08N	f	N	hap	4	284.306	71.7619	515.607	170.998	56.5104	7.7854	69.8415	33.182	1.46766	344.609	36.6595	0.571429	0.45	0.512195	1.29032	0.5
hap01_11N	11N	f	N	hap	4	233.903	53.9764	493.153	161.277	58.6634	8.63956	72.0806	31.2373	1.57376	331.876	40.8433	0.190476	0.1	0.146341	1.74194	0.181818
hap02_03P	03P	f	P	hap	4	268.256	59.1148	390.474	180.47	47.1988	9.63872	62.6764	22.4015	1.36351	210.004	40.275	0.285714	0.3	0.292683	0.387097	0.318182
hap02_07P	07P	f	P	hap	4	238.845	39.0708	419.227	203.129	50.6988	9.59965	63.9443	22.4698	1.35	216.098	41.4745	0.047619	0	0.0243902	1.06452	0.0151515
hap02_10N	10N	f	N	hap	4	244.851	51.3203	341.639	151.522	51.2753	10.861	68.7306	19.0562	1.45458	190.117	49.6744	0.666667	0.45	0.560976	0.193548	0.545455
hap03_01P	01P	f	P	hap	4	311.432	72.5665	432.637	206.947	52.5556	11.7801	69.3116	25.8249	1.07454	225.689	43.4867	0.190476	0.1	0.146341	1.32258	0.333333
hap04_03P	03P	f	P	hap	4	239.787	52.1074	352.768	173.693	53.1038	8.63426	62.3442	27.5093	1.02608	179.076	34.8349	0.52381	0.25	0.390244	0.580645	0.287879
hap05_01P	01P	f	P	hap	4	273.79	55.3222	362.687	158.236	56.2014	9.45692	75.5725	31.242	1.27145	204.452	44.3305	0.333333	0.25	0.292683	2.06452	0.318182
hap05_03P	03P	f	P	hap	4	240.783	69.2756	362.898	159.558	49.8823	9.3844	67.2829	21.7098	1.29669	203.341	45.5731	0.52381	0.35	0.439024	0.387097	0.348485
hap05_08N	08N	f	N	hap	4	233.706	59.2533	360.023	160.861	54.0472	8.29318	67.8769	27.0983	1.3144	199.163	40.7786	0.238095	0.05	0.146341	0.387097	0.257576
hap05_10N	10N	f	N	hap	4	242.266	69.9285	506.15	175.96	54.5699	7.96532	68.9528	26.7387	1.30918	330.191	42.2141	0.52381	0.25	0.390244	0.258065	0.515152
hap06_03P	03P	f	P	hap	4	308.728	95.0637	458.151	187.291	49.9534	11.1312	69.7125	22.8357	1.25351	270.86	46.8768	0.428571	0.35	0.390244	0.774194	0.409091
hap06_06N	06N	f	N	hap	4	275.351	85.5459	427.437	180.702	54.3581	8.06448	69.0578	28.0658	1.28615	246.736	40.992	0.380952	0.15	0.268293	0.967742	0.378788
hap06_10N	10N	f	N	hap	4	233.525	48.8639	352.785	182.635	55.2887	8.12417	67.5914	31.5746	1.31175	170.15	36.0168	0.619048	0.65	0.634146	0.419355	0.545455
hap08_09P	09P	f	P	hap	4	220.89	35.5403	272.148	143.726	53.4503	8.75274	69.7079	20.108	2.03875	128.422	49.5999	0.047619	0.2	0.121951	1.3871	0.0757576
hap09_03P	03P	f	P	hap	4	276.396	81.5808	446.334	182.105	49.4793	10.1094	67.1708	19.9519	1.36519	264.229	47.2188	0.666667	0.6	0.634146	0.322581	0.712121
hap09_06N	06N	f	N	hap	4	229.577	62.0877	364.262	169.765	52.6722	9.2819	69.0333	23.3413	1.33451	194.498	45.692	0.52381	0.15	0.341463	0.548387	0.424242
hap09_08N	08N	f	N	hap	4	229.295	42.8926	326.347	173.135	53.7185	8.99585	66.4436	24.9839	1.37435	153.212	41.4597	0.142857	0.05	0.097561	0.548387	0.106061
hap10_03P	03P	f	P	hap	4	270.418	53.9727	357.381	171.846	46.886	13.0663	66.9365	19.1519	1.52658	185.534	47.7846	0.761905	0.8	0.780488	0.290323	0.606061
hap10_06N	06N	f	N	hap	4	280.277	86.58	466.585	195.529	52.3174	10.3809	69.3844	27.8499	1.3741	271.056	41.5345	0.571429	0.4	0.487805	0.645161	0.5
hap10_08N	08N	f	N	hap	4	233.169	32.5016	288.323	181.948	53.6755	9.7005	67.0939	25.0128	1.39723	106.375	42.0811	0.0952381	0.05	0.0731707	1.06452	0.272727
hap11_01P	01P	f	P	hap	4	312.224	82.215	443.301	213.726	54.2255	11.0401	75.0477	29.3403	1.19268	229.574	45.7074	0.238095	0.4	0.317073	1.93548	0.378788
hap11_03P	03P	f	P	hap	4	265.212	79.9345	416.789	175.55	48.4436	10.5894	67.3972	17.2184	1.37141	241.239	50.1787	0.571429	0.35	0.463415	0.580645	0.454545
hap11_06N	06N	f	N	hap	4	296.052	70.9885	426.059	205.602	54.4816	9.12757	70.1755	31.6936	1.25059	220.456	38.4819	0.428571	0.4	0.414634	0.741935	0.484848
hap11_10N	10N	f	N	hap	4	244.563	54.8772	337.639	164.245	51.6201	11.2649	65.9192	25.1791	1.26662	173.395	40.7401	0.666667	0.45	0.560976	0.387097	0.5
hap12_03P	03P	f	P	hap	4	255.993	62.2332	389.235	189.979	46.9467	12.0375	63.7074	19.3557	1.41063	199.256	44.3517	0.714286	0.6	0.658537	0.354839	0.590909
hap12_05P	05P	f	P	hap	4	246.079	31.0194	325.296	187.632	55.1694	11.8784	71.0445	28.6262	1.60612	137.664	42.4183	0.285714	0.1	0.195122	1.16129	0.106061
hap12_06N	06N	f	N	hap	4	252.909	94.6436	505.658	166.555	54.1603	8.67546	68.286	29.2166	1.21231	339.103	39.0694	0.714286	0.45	0.585366	0.580645	0.636364
hap12_10N	10N	f	N	hap	4	235.62	47.8555	354.583	174.702	56.5796	8.41201	68.8072	20.1806	1.21991	179.881	48.6267	0.619048	0.55	0.585366	0.580645	0.606061
hap12_11N	11N	f	N	hap	4	255.24	63.4593	481.716	181.847	58.7433	8.61608	68.2569	24.9064	1.32522	299.869	43.3505	0.0952381	0	0.0487805	1.96774	0.136364
hap13_03P	03P	f	P	hap	4	249.437	58.4938	368.335	142.506	46.0302	11.402	69.0267	19.18	1.33179	225.829	49.8466	0.571429	0.45	0.512195	0.225806	0.363636
hap13_06N	06N	f	N	hap	4	262.331	109.72	573.978	172.443	48.2937	11.4975	68.3625	17.3897	1.34921	401.536	50.9728	0.666667	0.65	0.658537	0.645161	0.393939
hap13_07P	07P	f	P	hap	4	254.602	33.3125	353.052	205.519	51.0078	8.82422	65.5825	23.5844	1.312	147.532	41.9981	0.0952381	0	0.0487805	1.25806	0.136364
hap13_08N	08N	f	N	hap	4	259.517	91.5969	531.571	166.897	50.5302	10.208	70.5878	23.0987	1.37336	364.674	47.4892	0.047619	0.05	0.0487805	0.967742	0.0757576
hap14_05P	05P	f	P	hap	4	269.201	32.1109	332.302	215.561	53.794	11.2802	72.0223	23.3211	1.5337	116.741	48.7012	0.142857	0.05	0.097561	1.35484	0.227273
hap14_10N	10N	f	N	hap	4	237.487	39.4526	393.948	184.433	52.879	10.3168	67.097	17.7781	1.26948	209.515	49.3189	0.47619	0.25	0.365854	0.483871	0.166667
hap15_03P	03P	f	P	hap	4	259.889	51.959	358.505	173.864	48.7596	10.1991	65.114	21.8474	1.26955	184.64	43.2666	0.428571	0.25	0.341463	0.322581	0.348485
hap15_10N	10N	f	N	hap	4	235.469	40.8516	279.759	146.299	54.9753	12.0201	70.8658	26.1344	1.43204	133.46	44.7314	0.142857	0.2	0.170732	1.35484	0.272727
neu01_03P	03P	f	P	neu	5	231.649	74.3645	533.831	176.919	44.7549	9.95318	57.1835	20.5214	1.51655	356.912	36.6622	0.904762	0.95	0.926829	0.419355	0.848485
neu01_08N	08N	f	N	neu	5	198.669	27.8632	255.1	162.321	51.1132	9.33297	62.0702	24.1657	1.4029	92.7793	37.9045	0.619048	0.85	0.731707	1.29032	0.818182
neu01_09P	09P	f	P	neu	5	213.911	41.1696	281.949	156.734	51.225	10.4539	64.0001	19.4634	1.48161	125.215	44.5367	0.952381	0.9	0.926829	0.83871	0.833333
neu01_10N	10N	f	N	neu	5	212.659	59.2566	327.524	143.13	49.9356	8.47664	64.1825	21.2194	1.38712	184.393	42.9632	0.952381	0.8	0.878049	0.387097	0.818182
neu02_03P	03P	f	P	neu	5	213.403	19.5441	242.971	176.768	47.1563	9.6254	61.0045	20.3567	1.43268	66.2021	40.6478	0.380952	0.45	0.414634	1.64516	0.454545
neu02_05P	05P	f	P	neu	5	209.296	32.2914	387.459	179.537	49.1368	9.53166	64.0395	29.0707	1.57671	207.922	34.9688	0.333333	0.25	0.292683	0.935484	0.545455
neu02_06N	06N	f	N	neu	5	206.492	56.125	425.44	167.278	48.1527	9.85366	63.0186	20.2828	1.2717	258.163	42.7358	0.904762	0.65	0.780488	1.12903	0.772727
neu02_08N	08N	f	N	neu	5	200.222	19.4079	229.342	163.629	52.6366	9.54928	67.4939	25.6676	1.33048	65.7127	41.8263	0.857143	0.8	0.829268	1.29032	0.863636
neu03_03P	03P	f	P	neu	5	234.157	74.9798	477.93	181.628	45.6824	10.6141	64.0892	19.3767	1.07707	296.302	44.7125	0.47619	0.55	0.512195	1.22581	0.545455
neu03_05P	05P	f	P	neu	5	223.377	57.4627	507.745	179.668	52.3482	7.919	71.846	39.4794	1.16488	328.077	32.3666	0.666667	1	0.829268	1.25806	0.681818
neu03_08N	08N	f	N	neu	5	194.611	17.5648	227.806	170.792	50.3306	11.2235	70.2221	23.4449	1.07832	57.0141	46.7771	0.761905	0.8	0.780488	1.64516	0.80303
neu03_10N	10N	f	N	neu	5	200.903	37.5903	268.976	153.466	48.1229	10.6935	67.5853	18.9852	1.00503	115.511	48.6001	1	0.8	0.902439	0.741935	0.818182
neu04_03P	03P	f	P	neu	5	203.384	10.3806	220.023	184.506	48.3591	7.51075	59.1372	22.7674	1.21456	35.5168	36.3698	0.142857	0.2	0.170732	1.19355	0.318182
neu04_05P	05P	f	P	neu	5	218.418	38.0131	367.802	178.787	52.7109	7.45852	63.553	25.3046	1.16322	189.016	38.2484	0.52381	0.65	0.585366	1	0.681818
neu04_06N	06N	f	N	neu	5	187.669	16.5339	215.785	164.4	50.2609	7.3335	61.4295	26.3851	1.07435	51.3854	35.0444	0.761905	0.95	0.853659	0.741935	0.848485
neu04_08N	08N	f	N	neu	5	192.255	13.2796	213.919	168.115	53.3526	9.35431	65.2528	28.643	1.12859	45.8031	36.6099	1	0.85	0.926829	1.32258	0.80303
neu05_06N	06N	f	N	neu	5	189.648	22.7455	227.423	163.187	49.5998	7.61792	63.0615	26.5849	1.16998	64.2359	36.4765	0.904762	0.95	0.926829	0.322581	0.909091
neu05_07P	07P	f	P	neu	5	234.614	26.2362	375.041	216.749	48.7968	9.94267	64.3023	22.6072	1.28533	158.292	41.6951	0.714286	0.7	0.707317	1.41935	0.727273
neu05_08N	08N	f	N	neu	5	191.927	23.3943	236.104	162.257	51.3043	8.13334	64.7515	19.7977	1.30467	73.8473	44.9538	0.857143	0.95	0.902439	1.09677	0.848485
neu06_03P	03P	f	P	neu	5	222.125	47.5095	551.886	200.586	45.2916	9.92995	63.2636	19.1208	1.38993	351.301	44.1427	0.190476	0.05	0.121951	1.25806	0.287879
neu06_06N	06N	f	N	neu	5	199.116	14.6249	220.961	169.096	51.4446	7.70492	65.1287	30.678	1.2051	51.8647	34.4507	0.904762	0.9	0.902439	1.19355	0.833333
neu06_08N	08N	f	N	neu	5	192.288	16.344	225.988	169.606	53.127	8.41785	68.5744	30.4845	1.24027	56.3814	38.0899	0.619048	0.7	0.658537	1.80645	0.575758
neu07_03P	03P	f	P	neu	5	217.555	51.1608	522.198	186.992	44.4935	9.40054	59.131	20.4069	1.6146	335.206	38.7241	0.285714	0.3	0.292683	1.3871	0.424242
neu07_06N	06N	f	N	neu	5	191.759	18.1867	225.948	166.628	49.6279	9.28565	61.829	26.805	1.47735	59.3195	35.0239	0.857143	0.8	0.829268	0.451613	0.924242
neu09_06N	06N	f	N	neu	5	195.918	17.4419	266.218	168.65	49.6536	7.10361	64.2879	31.2249	1.32571	97.5673	33.063	1	1	1	0.387097	0.909091
neu10_01P	01P	f	P	neu	5	216.438	18.045	260.212	193.503	48.2862	11.0871	64.3225	22.4502	1.42329	66.7097	41.8723	0.571429	0.7	0.634146	1.48387	0.651515
neu11_06N	06N	f	N	neu	5	199.333	31.6416	330.341	163.484	48.5635	8.65717	58.9595	21.4601	1.33882	166.857	37.4994	0.666667	0.9	0.780488	0.870968	0.863636
neu11_07P	07P	f	P	neu	5	217.503	11.2337	242.906	199.713	49.5743	9.03848	61.9958	24.2993	1.22907	43.1924	37.6965	0.666667	0.85	0.756098	1.64516	0.681818
neu11_10N	10N	f	N	neu	5	202.612	31.8591	255.225	150.644	51.2052	8.60581	65.3079	20.6531	1.36678	104.581	44.6548	0.809524	0.85	0.829268	1.3871	0.772727
neu12_03P	03P	f	P	neu	5	198.859	12.0242	225.375	182.859	44.0079	9.64351	59.3219	20.7376	1.52249	42.5163	38.5843	0.238095	0.3	0.268293	0.935484	0.575758
neu12_08N	08N	f	N	neu	5	193.651	13.0213	220.559	166.979	51.0851	10.283	66.0253	24.9573	1.43476	53.58	41.0681	0.857143	0.95	0.902439	0.935484	0.818182
neu13_06N	06N	f	N	neu	5	208.377	68.5447	524.996	166.836	46.1874	9.37734	63.1167	22.7179	1.28986	358.16	40.3988	0.904762	0.75	0.829268	0.967742	0.80303
neu13_07P	07P	f	P	neu	5	239.86	39.8516	452.126	210.242	49.9429	9.57695	62.4021	19.5866	1.29531	241.884	42.8155	0.666667	0.75	0.707317	1.29032	0.712121
neu13_08N	08N	f	N	neu	5	197.584	23.1736	233.277	160.278	49.2196	9.57389	64.735	19.6328	1.28404	72.999	45.1022	0.904762	0.95	0.926829	0.806452	0.772727
neu13_09P	09P	f	P	neu	5	196.911	40.4201	395.645	162.163	48.8767	10.115	63.5049	17.8225	1.44841	233.481	45.6825	0.571429	0.65	0.609756	1.3871	0.515152
neu14_06N	06N	f	N	neu	5	192.819	16.5991	227.32	164.505	47.4864	9.69567	61.697	20.2151	1.30866	62.8142	41.4819	0.857143	0.8	0.829268	1.03226	0.772727
neu14_09P	09P	f	P	neu	5	189.229	18.5482	217.804	156.266	48.9247	11.1122	62.663	18.1655	1.45612	61.5379	44.4976	0.428571	0.65	0.536585	1.54839	0.469697
neu15_01P	01P	f	P	neu	5	214.496	9.69756	224.435	192.551	48.1068	10.2701	62.5942	18.4863	1.18961	31.8844	44.1079	0.285714	0.6	0.439024	1.6129	0.575758
neu15_03P	03P	f	P	neu	5	234.338	88.0919	550.499	184.01	45.056	8.15036	57.0837	19.6337	1.45517	366.489	37.4501	0.047619	0.2	0.121951	1.25806	0.257576
neu15_07P	07P	f	P	neu	5	226.675	17.748	284.035	173.928	47.532	10.1293	62.8243	23.2508	1.25932	110.107	39.5735	0.571429	0.6	0.585366	1.6129	0.636364
pls02_05P	05P	f	P	pls	6	326.403	74.7585	501.419	221.774	58.3104	10.5285	73.1722	21.2892	1.50601	279.644	51.883	1	0.9	0.95122	2.16129	0.878788
pls02_06N	06N	f	N	pls	6	401.766	126.14	607.087	206.494	56.3098	10.2178	71.4567	19.1829	1.45413	400.594	52.2738	0.904762	0.95	0.926829	1.93548	0.924242
pls03_01P	01P	f	P	pls	6	388.58	105.514	588.446	261.067	53.7023	15.2016	75.2426	18.9095	1.05109	327.379	56.3331	0.952381	0.85	0.902439	3.3871	0.818182
pls03_06N	06N	f	N	pls	6	325.483	113.127	539.753	181.586	54.5898	10.5335	76.093	28.6444	1.03145	358.167	47.4487	0.809524	0.8	0.804878	1.70968	0.80303
pls03_09P	09P	f	P	pls	6	333.021	123.578	517.437	154.458	59.8981	10.0603	74.0589	34.0135	0.939365	362.98	40.0454	0.619048	0.9	0.756098	2.16129	0.712121
pls04_06N	06N	f	N	pls	6	425.099	145.096	641.986	179.414	61.4763	6.58385	74.3148	42.9549	1.2805	462.572	31.3599	0.904762	0.9	0.902439	2	0.833333
pls04_09P	09P	f	P	pls	6	299.368	130.723	515.981	140.14	60.4379	8.20644	74.1723	30.1558	1.02651	375.841	44.0165	0.952381	0.85	0.902439	1.93548	0.757576
pls05_03P	03P	f	P	pls	6	324.161	91.6687	502.064	191.182	48.5164	11.6234	67.4932	17.717	1.54039	310.882	49.7762	0.952381	0.85	0.902439	0.967742	0.893939
pls05_06N	06N	f	N	pls	6	337.371	132.352	621.052	194.955	58.6541	8.12444	71.6477	34.9525	1.4532	426.098	36.6952	0.952381	0.9	0.926829	1.90323	0.939394
pls05_10N	10N	f	N	pls	6	288.672	95.8775	459.265	154.029	57.3508	8.59189	72.2426	24.6596	1.60286	305.235	47.583	0.428571	0.65	0.536585	1.51613	0.484848
pls06_01P	01P	f	P	pls	6	355.097	74.6091	463.375	239.958	59.7462	9.98588	73.0437	31.3105	1.33626	223.417	41.7332	0.857143	0.8	0.829268	2.83871	0.848485
pls06_10N	10N	f	N	pls	6	299.577	87.4684	456.371	153.396	56.4053	9.28016	71.0204	32.4958	1.51036	302.975	38.5246	0.857143	0.8	0.829268	1.74194	0.727273
pls06_10N	10N	f	N	pls	6	299.577	87.4684	456.371	153.396	56.4053	9.28016	71.0204	32.4958	1.51036	302.975	38.5246	0.333333	0.7	0.512195	1.70968	0.409091
pls07_03P	03P	f	P	pls	6	323.51	95.8869	502.628	199.62	46.9369	10.1451	64.311	18.7116	1.81522	303.007	45.5993	1	0.9	0.95122	0.903226	0.787879
pls07_06N	06N	f	N	pls	6	368.674	124.935	611.456	176.364	58.697	10.0679	71.7317	26.5479	1.58147	435.093	45.1838	0.333333	0.2	0.268293	1.22581	0.272727
pls08_03P	03P	f	P	pls	6	311.097	76.5223	453.926	209.552	47.9881	9.11784	69.2758	19.0469	2.01333	244.374	50.2289	0.761905	0.75	0.756098	0.612903	0.636364
pls08_06N	06N	f	N	pls	6	367.704	116.963	605.822	180.031	58.8885	10.0328	74.8036	24.1879	2.181	425.791	50.6158	0.619048	0.55	0.585366	1.35484	0.454545
pls09_01P	01P	f	P	pls	6	370.971	102.642	587.297	176.784	61.0572	10.2475	78.0579	32.4837	1.25361	410.513	45.5742	1	0.8	0.902439	3.06452	0.909091
pls09_09P	09P	f	P	pls	6	296.88	101.942	495.597	147.376	58.3314	8.14028	70.1295	34.7384	1.25719	348.221	35.3911	0.904762	0.95	0.926829	1.93548	0.909091
pls09_10N	10N	f	N	pls	6	304.992	81.1369	442.591	155.634	54.2887	12.7821	73.3811	20.5108	1.64916	286.956	52.8703	0.714286	0.6	0.658537	1.90323	0.666667
pls10_01P	01P	f	P	pls	6	349.354	55.8599	462.403	259.823	60.1238	10.249	74.7931	32.0481	1.50247	202.58	42.7451	0.952381	0.95	0.95122	2.90323	0.80303
pls10_05P	05P	f	P	pls	6	293.598	61.7176	426.059	223.185	58.9256	11.7776	75.7835	19.8808	1.65302	202.873	55.9027	0.809524	0.9	0.853659	2.77419	0.772727
pls10_06N	06N	f	N	pls	6	428.808	99.153	557.849	184.874	59.526	10.1252	76.1808	27.4561	1.90454	372.975	48.7247	0.904762	0.75	0.829268	1.74194	0.787879
pls11_01P	01P	f	P	pls	6	390.201	69.6476	560.516	268.654	56.6329	10.9828	72.8444	23.0281	1.25238	291.862	49.8162	0.952381	0.95	0.95122	2.19355	0.909091
pls11_08N	08N	f	N	pls	6	274.793	81.4758	426.611	172.671	54.8499	10.1099	74.7908	22.2959	1.29447	253.94	52.4949	0.571429	0.45	0.512195	1.12903	0.484848
pls11_09P	09P	f	P	pls	6	308.454	79.4806	445.421	151.751	58.0326	8.74327	71.1031	37.9377	1.3417	293.67	33.1654	0.904762	0.85	0.878049	1.90323	0.818182
pls11_10N	10N	f	N	pls	6	318.795	95.9412	454.967	153.604	56.8006	12.9609	77.0076	24.9395	1.70998	301.362	52.0681	0.47619	0.45	0.463415	2.29032	0.348485
pls12_03P	03P	f	P	pls	6	317.126	81.5988	481.73	192.627	52.3404	8.05083	62.1564	21.5145	1.26714	289.103	40.6419	0.761905	0.8	0.780488	0.548387	0.69697
pls12_08N	08N	f	N	pls	6	291.816	71.7881	441.761	187.104	56.2343	9.64341	71.1035	27.3687	1.45118	254.657	43.7347	0.285714	0.55	0.414634	1.54839	0.318182
pls12_09P	09P	f	P	pls	6	341.875	62.9204	509.018	203.419	57.6647	8.45102	69.0592	28.1855	1.27984	305.599	40.8737	0.619048	0.8	0.707317	1.70968	0.590909
pls12_10N	10N	f	N	pls	6	267.255	77.6372	461.022	152.85	56.9972	8.67641	73.2978	25.7857	1.48023	308.172	47.512	0.333333	0.4	0.365854	1.35484	0.287879
pls13_01P	01P	f	P	pls	6	387.074	45.3366	482.214	286.656	56.1005	11.9474	73.8041	20.0086	1.27971	195.558	53.7955	0.761905	0.6	0.682927	3.22581	0.818182
pls13_08N	08N	f	N	pls	6	284.597	109.929	586.756	174.446	52.5678	11.456	71.9541	19.7099	1.4354	412.309	52.2441	0.666667	0.6	0.634146	1.09677	0.545455
pls13_09P	09P	f	P	pls	6	334.413	114.735	509.149	145.854	55.2599	10.6985	71.9909	19.6407	1.26336	363.295	52.3502	0.904762	0.75	0.829268	1.87097	0.909091
pls13_10N	10N	f	N	pls	6	298.281	97.0288	571.158	163.725	53.2412	10.174	70.571	22.0707	1.75794	407.433	48.5002	0.0952381	0.25	0.170732	0.83871	0.272727
pls14_08N	08N	f	N	pls	6	314.836	76.5964	497.774	176.559	53.6528	11.8006	67.821	19.8376	1.38841	321.215	47.9834	0.714286	0.65	0.682927	1.54839	0.681818
pls14_09P	09P	f	P	pls	6	351.439	91.9351	491.851	162.836	55.3879	11.1609	73.4112	17.5329	1.32814	329.015	55.8783	0.809524	0.85	0.829268	2.19355	0.833333
pls14_10N	10N	f	N	pls	6	335.924	73.2738	453.178	165.719	56.5082	10.5544	69.3359	26.4345	1.34426	287.458	42.9014	0.333333	0.4	0.365854	1.58065	0.363636
pls15_01P	01P	f	P	pls	6	366.792	83.5726	514.754	215.27	60.4106	11.3845	76.9963	22.5083	1.31633	299.483	54.488	0.428571	0.75	0.585366	3.64516	0.530303
pls15_06N	06N	f	N	pls	6	415.512	114.591	574.398	159.97	56.9167	10.2189	68.6212	16.8223	1.6615	414.428	51.7989	0.952381	0.9	0.926829	1.70968	0.742424
sad01_03P	03P	f	P	sad	7	207.058	12.3408	237.816	189.573	43.156	9.66354	57.0661	20.2491	1.72365	48.2427	36.817	0.761905	0.75	0.756098	1.51613	0.80303
sad01_06N	06N	f	N	sad	7	219.249	36.0823	303.3	185.497	48.4239	9.1443	62.603	17.5224	1.85054	117.803	45.0807	0.952381	0.9	0.926829	1	0.924242
sad01_07P	07P	f	P	sad	7	233.223	21.3084	320.344	195.285	47.8316	9.78523	61.8043	22.1661	1.37467	125.059	39.6381	0.857143	0.8	0.829268	1.70968	0.712121
sad01_08N	08N	f	N	sad	7	197.185	25.4538	257.034	161.482	51.1839	10.8155	64.9308	18.4788	1.66299	95.552	46.452	0.428571	0.6	0.512195	1.12903	0.651515
sad01_11N	11N	f	N	sad	7	236.208	21.1504	294.638	199.808	51.9721	9.72565	65.5938	19.895	1.72111	94.8309	45.6988	0.619048	0.65	0.634146	2.22581	0.681818
sad02_06N	06N	f	N	sad	7	230.164	41.3354	407.376	187.669	49.6335	9.89781	66.2875	20.43	1.64043	219.707	45.8575	0.857143	0.85	0.853659	1.25806	0.787879
sad02_07P	07P	f	P	sad	7	224.728	13.9066	253.121	201.098	47.5369	8.97033	61.7508	20.691	1.41091	52.0224	41.0598	0.333333	0.5	0.414634	1.03226	0.363636
sad02_08N	08N	f	N	sad	7	193.371	19.9284	236.528	173.011	49.7949	11.2224	67.4049	16.2542	1.79796	63.5171	51.1507	0.857143	0.95	0.902439	1.51613	0.818182
sad03_06N	06N	f	N	sad	7	219.353	40.7534	372.98	190.257	49.7897	10.4798	67.5863	20.0124	1.25905	182.723	47.5739	0.904762	0.85	0.878049	1.77419	0.863636
sad03_07P	07P	f	P	sad	7	222.399	16.3738	267.138	204.348	44.8725	10.5526	60.4506	24.7603	0.990544	62.7897	35.6904	0.428571	0.15	0.292683	1.70968	0.242424
sad03_08N	08N	f	N	sad	7	212.194	29.4434	281.642	169.021	49.8816	12.0402	62.796	17.9934	1.36542	112.621	44.8026	0.952381	0.7	0.829268	1.54839	0.863636
sad04_03P	03P	f	P	sad	7	237.533	24.2585	272.168	197.878	47.2477	6.99198	56.7118	22.6644	1.31435	74.2905	34.0474	0.857143	0.85	0.853659	1.48387	0.863636
sad04_06N	06N	f	N	sad	7	223.544	55.3713	455.7	193.219	52.5849	6.24742	61.111	26.2563	1.39054	262.48	34.8548	0.952381	0.9	0.926829	1.45161	0.909091
sad04_07P	07P	f	P	sad	7	224.128	10.0615	251.537	209.316	47.3583	8.52499	58.7804	27.2212	1.29789	42.2207	31.5592	0.619048	0.55	0.585366	1.77419	0.424242
sad05_01P	01P	f	P	sad	7	254.056	31.1986	326.954	204.172	46.1026	9.13882	61.0303	22.7559	1.35306	122.783	38.2744	0.761905	0.6	0.682927	2.06452	0.757576
sad05_06N	06N	f	N	sad	7	217.625	20.4625	264.904	192.087	48.4382	9.15315	66.2647	24.5705	1.53732	72.8167	41.6942	0.904762	0.9	0.902439	1.09677	0.712121
sad05_11N	11N	f	N	sad	7	218.159	29.2183	276.432	178.875	53.3435	8.4053	67.3789	24.8599	1.46834	97.5563	42.519	0.428571	0.4	0.414634	1.93548	0.19697
sad06_03P	03P	f	P	sad	7	234.705	32.7295	311.286	198.355	43.6493	8.69693	56.5255	18.5418	1.66245	112.931	37.9837	0.857143	0.8	0.829268	1.58065	0.818182
sad06_05P	05P	f	P	sad	7	226.399	20.1257	268.255	193.35	54.1056	6.49488	68.3103	40.7758	1.49274	74.9052	27.5345	0.52381	0.5	0.512195	2.03226	0.575758
sad07_01P	01P	f	P	sad	7	251.714	25.4197	313.832	219.458	45.4821	8.95268	64.0551	22.0528	1.58122	94.3746	42.0022	0.904762	0.9	0.902439	1.96774	0.727273
sad07_03P	03P	f	P	sad	7	212.529	18.372	259.245	190.099	42.2506	9.27811	54.7787	21.2597	1.67018	69.1462	33.519	0.809524	0.65	0.731707	1.64516	0.878788
sad07_11N	11N	f	N	sad	7	222.819	30.4585	271.799	129.116	53.4608	8.60513	65.1871	30.2425	1.73497	142.684	34.9446	0.190476	0.15	0.170732	2.06452	0.363636
sad08_06N	06N	f	N	sad	7	224.279	17.6386	260.003	191.279	48.6667	8.58906	67.1105	24.9795	2.26603	68.7241	42.131	0.52381	0.75	0.634146	1.09677	0.545455
sad09_03P	03P	f	P	sad	7	209.345	11.0863	238.371	191.171	42.8909	9.08886	58.1408	21.283	1.71755	47.2	36.8579	0.952381	0.9	0.926829	1.25806	0.893939
sad09_11N	11N	f	N	sad	7	224.999	25.4715	283.775	185.643	52.8398	7.99395	64.6512	21.4645	1.62492	98.132	43.1867	0.52381	0.35	0.439024	2.41935	0.545455
sad10_01P	01P	f	P	sad	7	238.17	22.4675	284.087	204.28	46.8659	9.64326	62.9077	22.978	1.55825	79.8066	39.9297	0.952381	0.8	0.878049	1.54839	0.863636
sad10_08N	08N	f	N	sad	7	180.629	16.9266	218.871	161.876	50.2446	9.79928	65.5713	17.7844	1.8944	56.9943	47.7869	0.857143	0.9	0.878049	1.35484	0.787879
sad11_03P	03P	f	P	sad	7	232.081	29.4628	290.533	197.744	41.0324	9.15027	54.1378	19.3453	1.54748	92.7888	34.7925	0.857143	0.85	0.853659	1.22581	0.939394
sad11_11N	11N	f	N	sad	7	221.784	28.2009	271.769	182.651	54.0683	8.95905	65.2291	19.7151	1.62923	89.1181	45.514	0.571429	0.45	0.512195	1.67742	0.393939
sad12_03P	03P	f	P	sad	7	210.388	22.2196	276.4	164.988	42.6988	10.4437	55.3648	20.202	1.8017	111.411	35.1629	0.952381	0.75	0.853659	1.32258	0.787879
sad12_08N	08N	f	N	sad	7	176.924	20.0496	239.358	157.455	48.7192	10.1372	65.1663	17.164	1.79873	81.9024	48.0023	0.619048	0.75	0.682927	0.903226	0.606061
sad12_11N	11N	f	N	sad	7	222.716	35.1022	273.537	165.608	53.1502	10.8346	66.9304	19.4904	1.64122	107.929	47.44	0.285714	0.2	0.243902	1.19355	0.121212
sad13_01P	01P	f	P	sad	7	229.95	17.2152	267.411	205.511	43.4907	10.2388	60.8905	20.5017	1.40451	61.8998	40.3889	0.904762	0.9	0.902439	2.16129	0.69697
sad13_05P	05P	f	P	sad	7	243.944	57.1968	447.809	195.863	50.9789	7.01245	64.5388	32.1411	1.44512	251.945	32.3977	0.571429	0.6	0.585366	1.22581	0.393939
sad14_03P	03P	f	P	sad	7	222.427	24.2661	262.008	188.082	46.6623	6.84495	60.7224	29.6784	1.49515	73.9254	31.044	1	0.8	0.902439	1.45161	0.909091
sad14_08N	08N	f	N	sad	7	219.527	89.944	574.189	164.938	48.0935	10.9908	65.9106	18.595	1.71404	409.251	47.3156	0.809524	0.85	0.829268	1.41935	0.818182
sad15_01P	01P	f	P	sad	7	243.33	24.5983	288.113	204.333	46.9542	9.83462	61.0058	25.5155	1.30465	83.7803	35.4903	0.761905	0.55	0.658537	1.96774	0.621212
sad15_05P	05P	f	P	sad	7	231.291	35.6855	441.149	202.336	55.3159	6.07205	65.6839	37.7159	1.45034	238.813	27.9679	0.761905	0.65	0.707317	1.16129	0.545455
sad15_06N	06N	f	N	sad	7	196.695	16.6483	236.367	169.179	46.2037	9.13192	57.426	18.4537	1.92583	67.1883	38.9723	1	1	1	1.35484	0.909091
sad15_08N	08N	f	N	sad	7	175.188	18.6906	218.651	153.347	48.9713	8.66145	57.479	22.1922	1.65993	65.3045	35.2868	0.952381	0.85	0.902439	1.06452	0.80303

## Sheet: Study1A
Participant	Age	Sex(1=Female)	NonStressedRating	Stressed_Rating	NonStressedScale	StressedScale	NonStressAccuracy	StressAccuracy	d'
P01	19	1	0.6	0.57	2.36	2.08	0.4	0.57	-0.0733347
P02	20	1	0.51	0.63	2.07	2.56	0.49	0.63	0.292255
P03	19	1	0.27	0.29	0.92	0.89	0.73	0.29	0.0634411
p04	19	1	0.49	0.56	2.45	2.71	0.51	0.56	0.161635
P05	21	1	0.56	0.6	1.46	1.46	0.44	0.6	0.109618
P06	21	2	0.49	0.55	1.79	2.1	0.51	0.55	0.143567
P07	19	1	0.48	0.56	1.51	1.72	0.52	0.56	0.197469
P08	25	1	0.47	0.61	1.29	1.72	0.53	0.61	0.343559
P09	20	1	0.36	0.54	1.72	2.69	0.64	0.54	0.454661
P10	36	1	0.44	0.67	0.99	1.71	0.56	0.67	0.605705
P11	20	1	0.51	0.71	1.51	1.97	0.49	0.71	0.527152
P12	20	1	0.26	0.37	2.01	2.34	0.74	0.37	0.302116
P14	21	2	0.67	0.7	2.17	2.02	0.33	0.7	0.0805392
P15	20	1	0.35	0.36	1.67	1.74	0.65	0.36	0.038294
P16	21	1	0.26	0.34	0.64	0.86	0.74	0.34	0.206
P17	20	1	0.54	0.57	1.9	1.95	0.46	0.57	0.09037
p18	20	1	0.59	0.71	2.35	2.83	0.41	0.71	0.331048
P19	20	1	0.52	0.6	2.46	2.59	0.48	0.6	0.199608
P20	21	1	0.24	0.42	0.59	1.1	0.76	0.42	0.498901
P21	19	1	0.26	0.34	2.89	2.86	0.74	0.34	0.206
p23	19	2	0.33	0.41	1.06	1.29	0.67	0.41	0.20896
P24	20	1	0.49	0.69	2.31	2.9	0.51	0.69	0.501644
P25	19	1	0.34	0.41	2.07	2.46	0.66	0.41	0.189287
p26	20	1	0.39	0.51	1.04	1.4	0.61	0.51	0.289785
P27	20	2	0.3	0.36	1.16	1.29	0.7	0.36	0.177374
p28	20	1	0.49	0.69	1.39	1.84	0.51	0.69	0.501644
p29	20	1	0.54	0.7	2.59	3.26	0.46	0.7	0.434758
P30	19	1	0.43	0.61	1.34	1.64	0.57	0.61	0.470519
P31	20	2	0.38	0.31	0.97	0.86	0.62	0.31	-0.19473
P32	19	1	0.43	0.6	1.01	1.48	0.57	0.6	0.433359
P33	20	1	0.68	0.74	2.02	2.26	0.32	0.74	0.16648

## Sheet: Study1B
Participant	Age	Sex(1Female)	NS_Anger	NS_Disgust	NS_Fear	NS_Happiness	NS_Neutral	NS_Sadness	NS_Surprise	NS_Total	ST_Anger	ST_Disgust	ST_Fear	ST_Happy	ST_Neutral	ST_Sadness	ST_Surprise	ST_Total	ALL_Total	NS_Anger_Hu	NS_Disgust_Hu	NS_Fear_Hu	NS_Happy_Hu	NS_Neutral_Hu	NS_Sad_Hu	NS_Surprise_Hu	ST_Anger_Hu	ST_Disgust_Hu	ST_Fear_Hu	ST_Happy_Hu	ST_Neutral_Hu	ST_Sad_Hu	ST_Surprise_Hu	Anger_Hu	Disgust_Hu	Fear_Hu	Happy_Hu	Neutral_Hu	Sad_Hu	Surprise_Hu
p100	20	1	0.75	0.55	0.55	0.55	0.9	1	0.5	0.69	0.85	0.55	0.45	0.35	0.55	0.8	0.8	0.62	0.65	0.950127	0.688119	0.835482	0.483448	0.825441	1.00685	0.739881	1.01599	0.639206	0.735314	0.633052	0.442472	0.628796	1.0506	0.98	0.66	0.79	0.56	0.63	0.82	0.9
p101	48	2	0.7	0.25	0.1	0.1	0.7	0.3	0.75	0.41	0.6	0	0	0.1	0.55	0.35	0.75	0.34	0.38	0.89887	0.283282	0.225513	0.201358	0.517806	0.33143	0.543984	0.735314	0	0	0.201358	0.328867	0.348582	0.701674	0.82	0.14	0.11	0.2	0.42	0.34	0.62
P102	19	2	0.85	0.3	0.65	0.4	0.95	0.8	0.55	0.64	0.55	0.2	0.25	0.25	0.65	0.8	0.8	0.5	0.57	1.1731	0.381275	0.813538	0.480114	0.849637	0.895817	0.503372	0.717331	0.261157	0.381893	0.473985	0.549303	0.628796	0.697855	0.95	0.32	0.6	0.48	0.7	0.76	0.6
P103	20	2	0.95	0.95	0.65	0.5	0.8	0.65	0.2	0.67	0.65	0.65	0.4	0.4	0.8	0.55	0.75	0.6	0.64	1.25324	0.984879	0.937744	0.453961	0.684719	0.782457	0.373792	0.889725	0.754824	0.684719	0.519146	0.519146	0.599571	0.994571	1.07	0.87	0.81	0.49	0.6	0.69	0.68
P104	19	2	0.95	0.3	0.5	0.3	0.7	0.55	0.25	0.51	0.4	0.35	0.4	0.35	0.65	0.7	0.7	0.51	0.51	1.04961	0.463648	0.739881	0.271657	0.532668	0.566575	0.328632	0.542639	0.431606	0.684719	0.5489	0.44294	0.608391	0.75204	0.8	0.45	0.71	0.41	0.49	0.59	0.54
P105	20	2	0.75	0.45	0.6	0.25	0.95	0.85	0.5	0.62	0.4	0.45	0.2	0.3	0.8	0.7	0.8	0.52	0.57	0.994571	0.689817	0.765393	0.303442	0.695136	0.915109	0.555121	0.519146	0.5272	0.373792	0.494216	0.513738	0.661043	1.00335	0.76	0.61	0.57	0.4	0.6	0.79	0.78
p107	20	2	0.65	0.3	0.45	0.3	0.4	0.8	0.7	0.51	0.5	0.15	0.2	0.35	0.45	0.75	0.65	0.44	0.48	0.635234	0.463648	0.689817	0.397699	0.411517	0.619196	0.646585	0.50974	0.277406	0.344857	0.517806	0.454658	0.551332	0.521899	0.57	0.37	0.52	0.46	0.43	0.59	0.58
p108	21	2	0.45	0.25	0.4	0.6	0.45	0.5	0.5	0.45	0.3	0.2	0	0.25	0.3	0.7	0.65	0.34	0.4	0.689817	0.473985	0.684719	0.478197	0.319712	0.496932	0.555121	0.463648	0.302746	0	0.209135	0.219399	0.576329	0.668425	0.58	0.39	0.34	0.34	0.27	0.54	0.61
p109	19	2	0.8	0.55	0.55	0.65	0.85	0.5	0.6	0.64	0.4	0.6	0.4	0.5	0.55	0.4	0.85	0.53	0.59	1.0506	0.662283	0.835482	0.570194	0.654418	0.785398	0.684719	0.684719	0.643501	0.480114	0.573203	0.449831	0.391294	0.841284	0.87	0.65	0.66	0.57	0.55	0.59	0.76
P110	20	2	0.65	0.75	0.65	0.35	0.55	0.8	0.45	0.6	0.5	0.5	0.05	0.45	0.4	0.8	0.7	0.49	0.54	0.813538	0.848062	0.937744	0.357571	0.503372	0.672315	0.619892	0.61548	0.5932	0.129461	0.494216	0.344857	0.601264	0.775397	0.71	0.72	0.53	0.43	0.42	0.64	0.7
P111	20	2	0.75	0.55	0.35	0.5	0.45	0.6	0.6	0.54	0.35	0.3	0.1	0.2	0.3	0.8	0.7	0.39	0.47	1.0472	0.526001	0.5489	0.48505	0.433035	0.593786	0.593786	0.5489	0.304693	0.169846	0.302746	0.225513	0.638865	0.711213	0.8	0.42	0.36	0.39	0.33	0.62	0.65
P112	19	2	0.75	0	0.5	0.25	1	0.5	0.7	0.53	0.3	0.15	0.1	0.3	0.85	0.3	0.65	0.38	0.45	1.0472	0	0.739881	0.246463	0.676701	0.668964	0.67654	0.57964	0.213756	0.261157	0.416454	0.479096	0.33143	0.620421	0.81	0.11	0.5	0.33	0.58	0.5	0.65
P113	20	2	0.85	0.4	0.35	0.15	0.85	0.3	0.6	0.5	0.65	0.3	0.35	0.35	0.6	0.7	0.8	0.54	0.52	0.978239	0.569677	0.586439	0.203665	0.55524	0.353742	0.609037	0.848902	0.463648	0.402057	0.5489	0.432408	0.69321	0.777706	0.91	0.52	0.49	0.38	0.49	0.52	0.69
P114	19	2	0.9	0.6	0.3	0.4	0.95	0.7	0.3	0.59	0.75	0.55	0.45	0.6	0.6	0.95	0.85	0.68	0.64	1.03159	0.735314	0.57964	0.327089	0.748184	0.829901	0.494216	0.796763	0.618423	0.689817	0.765393	0.566469	0.932138	0.944908	0.91	0.68	0.63	0.55	0.66	0.88	0.72
P115	21	2	0.45	0.4	0.25	0.2	0.8	0.8	0.6	0.5	0.45	0.5	0.1	0.2	0.7	0.55	0.75	0.46	0.48	0.689817	0.542639	0.523599	0.261157	0.508496	0.759461	0.643501	0.567888	0.701674	0.261157	0.373792	0.416044	0.552015	0.774528	0.63	0.62	0.39	0.32	0.46	0.66	0.71
P116	21	2	0.85	0.3	0.45	0.55	0.9	0.7	0.55	0.61	0.9	0.15	0.4	0.45	0.45	0.85	0.65	0.55	0.58	0.978239	0.463648	0.619892	0.493107	0.964184	0.775397	0.493107	0.99591	0.256345	0.463648	0.592162	0.4799	0.635607	0.687148	0.99	0.36	0.54	0.54	0.72	0.71	0.59
p40	20	1	0.4	0.1	0.2	0.35	0.7	0.85	0.65	0.46	0.55	0.25	0.1	0.35	0.25	0.8	0.7	0.43	0.45	0.542639	0.124355	0.373792	0.357571	0.557599	0.736885	0.668425	0.582364	0.303442	0.321751	0.416044	0.205569	0.601264	0.80119	0.56	0.21	0.35	0.39	0.38	0.67	0.73
P42	21	1	0.75	0.6	0.15	0.6	0.7	0.7	0.6	0.59	0.3	0.3	0.35	0.4	0.65	0.35	0.55	0.41	0.5	0.994571	0.839349	0.239453	0.554167	0.661043	0.661043	0.566469	0.463648	0.397699	0.332468	0.43525	0.491058	0.357571	0.582364	0.73	0.62	0.29	0.49	0.58	0.51	0.57
P43	19	1	0.75	0.5	0.55	0.5	0.9	0.65	0.4	0.61	0.55	0.65	0.55	0.45	0.5	0.75	0.75	0.6	0.6	0.950127	0.785398	0.750755	0.44486	0.735314	0.668425	0.480114	0.750755	0.707584	0.582364	0.652003	0.428193	0.701674	0.848062	0.85	0.75	0.67	0.55	0.58	0.69	0.66
P45	24	1	0.85	0.6	0.85	0.5	0.95	0.85	0.65	0.75	0.65	0.55	0.6	0.55	0.75	0.85	0.95	0.7	0.73	1.1731	0.886077	1.01599	0.573203	0.801115	1.05944	0.707584	0.754824	0.688119	0.735314	0.835482	0.672369	0.801472	1.08839	0.96	0.79	0.88	0.7	0.74	0.93	0.9
p46	19	1	0.8	0.6	0.3	0.25	0.9	0.7	0.45	0.57	0.65	0.35	0	0.45	0.8	0.65	1	0.56	0.56	1.10715	0.886077	0.531808	0.266673	0.605545	0.730744	0.546401	0.848902	0.633052	0	0.689817	0.513738	0.606613	0.979924	0.98	0.76	0.27	0.48	0.56	0.67	0.76
P47	20	1	0.8	0.6	0.35	0.45	0.9	0.45	0.8	0.62	0.55	0.5	0.3	0.45	0.95	0.5	0.95	0.6	0.61	0.867586	0.799686	0.633052	0.4799	0.748221	0.689817	0.672315	0.688119	0.538663	0.531808	0.652003	0.714927	0.668964	0.832437	0.78	0.67	0.58	0.57	0.73	0.68	0.75
P48	19	1	0.95	0.5	0.4	0.7	0.95	0.65	0.55	0.67	0.85	0.05	0.15	0.4	0.7	0.65	0.75	0.51	0.59	1.25324	0.739881	0.684719	0.69321	0.736571	0.730022	0.618423	0.915109	0.225513	0.342041	0.448774	0.468836	0.668425	0.735314	1.08	0.48	0.51	0.57	0.6	0.7	0.68
P49	19	1	0.7	0.5	0.5	0.3	0.75	0.45	0.55	0.54	0.6	0.7	0.2	0.35	0.4	0.55	0.75	0.51	0.52	0.86217	0.50974	0.5932	0.353742	0.566979	0.619892	0.582364	0.708626	0.646585	0.218669	0.517806	0.327089	0.618423	0.848062	0.79	0.58	0.41	0.44	0.45	0.62	0.72
P50	22	1	0.85	0.55	0.55	0.25	0.75	0.8	0.75	0.64	0.6	0.5	0.35	0.25	0.25	0.9	0.9	0.54	0.59	1.11063	0.639206	0.835482	0.303442	0.686541	0.818756	0.686541	0.684719	0.668964	0.586439	0.523599	0.246463	0.619892	0.886077	0.9	0.65	0.71	0.41	0.47	0.72	0.79
P51	19	1	0.8	0.5	0.85	0.25	0.8	0.8	0.6	0.66	0.5	0.3	0.6	0.3	0.55	0.85	0.95	0.58	0.62	0.96278	0.555121	1.05944	0.343835	0.697855	0.927295	0.609037	0.640522	0.366734	0.765393	0.57964	0.428779	0.723116	1.08839	0.8	0.46	0.91	0.46	0.56	0.83	0.85
P52	21	1	0.85	0.8	0.6	0.4	0.9	0.75	0.6	0.7	0.65	0.45	0.2	0.6	0.75	0.7	0.65	0.57	0.64	1.11063	1.0506	0.886077	0.448774	0.723075	0.848062	0.663131	0.730022	0.494216	0.463648	0.735314	0.536925	0.69321	0.813538	0.92	0.77	0.67	0.59	0.63	0.77	0.74
P53	19	1	1	0.8	0.6	0.2	0.95	0.6	0.75	0.7	0.75	0.6	0.4	0.35	0.7	0.7	0.7	0.6	0.65	1.20129	0.895817	0.839349	0.321751	0.868032	0.799686	0.659058	0.878032	0.799686	0.49848	0.5489	0.597108	0.67654	0.633052	1.04	0.85	0.67	0.44	0.73	0.74	0.65
P54	19	1	0.55	0.25	0.15	0.5	0.9	0.7	0.55	0.51	0.4	0.5	0.3	0.4	0.75	0.6	0.8	0.54	0.53	0.789565	0.328632	0.342041	0.393564	0.807986	0.711213	0.526001	0.638865	0.538663	0.463648	0.480114	0.543984	0.643501	0.777706	0.71	0.43	0.4	0.44	0.68	0.68	0.65
P56	21	1	0.85	0.7	0.35	0.65	0.65	0.75	0.45	0.63	0.65	0.6	0.5	0.5	0.35	0.95	0.9	0.64	0.63	0.978239	0.86217	0.431606	0.581586	0.730022	0.717886	0.546401	0.730022	0.839349	0.50974	0.739881	0.449063	0.725499	1.03159	0.85	0.85	0.47	0.66	0.59	0.72	0.79
P57	21	1	0.55	0	0.3	0.2	0.45	0.45	0.6	0.36	0.55	0.3	0.3	0.35	0.6	0.5	0.8	0.49	0.43	0.618423	0	0.304693	0.273061	0.454658	0.397699	0.456856	0.552015	0.416454	0.312873	0.449063	0.554167	0.496932	0.759461	0.59	0.21	0.31	0.36	0.5	0.45	0.61
P58	20	1	0.75	0.4	0.35	0.45	0.9	0.45	0.85	0.59	0.5	0.3	0.3	0.4	0.55	0.55	0.7	0.47	0.53	0.821143	0.542639	0.468836	0.494216	0.864297	0.567888	0.697808	0.668964	0.397699	0.397699	0.601264	0.474339	0.514311	0.525078	0.75	0.47	0.43	0.55	0.67	0.54	0.61
p59	20	1	0.75	0.15	0	0.2	0.95	0.75	0.65	0.49	0.8	0.25	0	0.25	0.45	0.85	0.85	0.49	0.49	1.0472	0.256345	0	0.218669	0.704817	0.701674	0.549303	0.818756	0.436287	0	0.406378	0.31575	0.664486	0.978239	0.93	0.35	0	0.31	0.51	0.68	0.76
P61	19	1	0.7	0.55	0.15	0.25	0.95	0.6	0.6	0.54	0.6	0.45	0.15	0.2	0.8	0.45	0.5	0.45	0.5	0.991157	0.750755	0.277406	0.303442	0.597686	0.684719	0.684719	0.799686	0.592162	0.397699	0.321751	0.45979	0.4799	0.555121	0.9	0.67	0.34	0.31	0.53	0.58	0.62
P62	19	1	0.7	0.6	0.55	0.35	0.95	0.7	0.85	0.67	0.35	0.3	0.45	0.3	0.7	0.9	1	0.57	0.62	0.991157	0.684719	0.789565	0.517806	0.760388	0.775397	0.801472	0.586439	0.381275	0.619892	0.463648	0.525078	0.844154	0.955317	0.79	0.53	0.7	0.49	0.64	0.81	0.88
P63	20	1	0.65	0.35	0.7	0.45	0.95	0.7	0.55	0.62	0.5	0.5	0.35	0.4	0.65	0.7	1	0.59	0.6	0.889725	0.468836	0.89887	0.423322	0.801115	0.775397	0.599571	0.640522	0.573203	0.517806	0.601264	0.559453	0.576329	1.0697	0.77	0.52	0.71	0.51	0.68	0.68	0.83
P64	20	1	0.85	0.4	0.6	0.5	0.65	0.65	0.6	0.61	0.9	0.4	0.45	0.35	0.55	0.8	0.8	0.61	0.61	0.915109	0.569677	0.839349	0.496932	0.549303	0.730022	0.625546	1.03159	0.684719	0.619892	0.49149	0.449831	0.697855	0.818756	0.97	0.63	0.73	0.49	0.5	0.71	0.72
P65	20	1	0.9	0.6	0.45	0.35	0.9	0.8	0.6	0.66	0.65	0.7	0.55	0.3	0.55	0.75	0.85	0.62	0.64	1.03159	0.765393	0.567888	0.468836	0.825441	0.777706	0.625546	0.889725	0.829901	0.552015	0.531808	0.503372	0.634689	0.978239	0.96	0.8	0.56	0.5	0.66	0.71	0.8
P66	20	1	0.8	0.7	0.7	0.55	0.9	0.85	0.8	0.76	0.55	0.6	0.45	0.6	0.7	0.8	0.95	0.66	0.71	1.10715	0.80119	0.991157	0.639206	0.825441	0.978239	0.842041	0.789565	0.643501	0.689817	0.839349	0.608391	0.726642	0.984879	0.95	0.72	0.84	0.74	0.72	0.85	0.91
p67	20	1	0.9	0.3	0.3	0.4	0.9	0.55	0.45	0.54	0.65	0.2	0.25	0.15	0.45	0.6	0.8	0.44	0.49	0.935649	0.463648	0.463648	0.411517	0.723075	0.552015	0.494216	0.707584	0.344857	0.436287	0.304693	0.323828	0.511973	0.697855	0.82	0.4	0.45	0.36	0.52	0.53	0.6
P68	20	1	0.45	0.2	0.25	0.25	0.85	0.55	0.6	0.45	0.15	0.35	0.35	0.2	0.6	0.55	0.85	0.44	0.44	0.689817	0.250687	0.406378	0.315284	0.602455	0.566575	0.511973	0.397699	0.49149	0.357571	0.463648	0.381275	0.526001	0.841284	0.54	0.37	0.38	0.39	0.49	0.55	0.68
p69	19	1	0.9	0.7	0.25	0.55	1	0.35	0.75	0.64	0.6	0.3	0.05	0.3	0.7	0.35	0.7	0.43	0.54	1.11977	0.86217	0.473985	0.526001	0.874098	0.449063	0.717886	0.708626	0.304693	0.15878	0.381275	0.458629	0.416044	0.711213	0.91	0.58	0.32	0.45	0.67	0.43	0.71
P70	19	1	0.65	0.6	0.45	0.2	0.65	0.6	0.65	0.54	0.55	0.45	0.25	0.35	0.5	0.7	0.7	0.5	0.52	0.813538	0.609037	0.735314	0.250687	0.498251	0.625546	0.668425	0.789565	0.466765	0.406378	0.5489	0.376435	0.620348	0.67654	0.8	0.54	0.57	0.4	0.44	0.62	0.67
P71	20	1	0.45	0.3	0.15	0.2	0.75	0.8	0.7	0.48	0.45	0.4	0.25	0.2	0.3	0.45	0.85	0.41	0.45	0.689817	0.321751	0.225513	0.241383	0.646523	0.797399	0.576329	0.689817	0.463648	0.230247	0.344857	0.243361	0.44345	0.767061	0.69	0.39	0.23	0.29	0.44	0.62	0.67
P72	20	1	0.8	0.45	0.25	0.25	1	0.55	0.7	0.57	0.55	0.45	0.25	0.3	0.95	0.45	0.7	0.52	0.55	1.10715	0.619892	0.473985	0.328632	0.647285	0.599571	0.775397	0.835482	0.619892	0.436287	0.57964	0.516548	0.619892	0.829901	0.97	0.62	0.46	0.45	0.58	0.61	0.8
P73	20	1	0.8	0.45	0.2	0.45	0.85	0.75	0.5	0.57	0.9	0.15	0.05	0.65	0.4	0.85	0.8	0.54	0.56	1.0506	0.735314	0.373792	0.363723	0.801472	0.686541	0.523599	0.886077	0.342041	0.225513	0.730022	0.382242	0.6268	0.818756	0.97	0.54	0.3	0.55	0.59	0.66	0.67
P74	16	1	0.6	0.35	0.1	0.55	0.75	0.65	0.6	0.51	0.55	0.25	0.2	0.55	0.4	0.75	0.7	0.49	0.5	0.886077	0.449063	0.225513	0.526001	0.530135	0.651183	0.643501	0.688119	0.473985	0.463648	0.493107	0.290515	0.646523	0.829901	0.79	0.46	0.34	0.51	0.41	0.65	0.74
P75	19	1	0.85	0.5	0.6	0.45	0.55	0.7	0.45	0.59	0.45	0.45	0.3	0.4	0.25	0.9	0.6	0.48	0.53	0.944908	0.555121	0.684719	0.494216	0.599571	0.67654	0.466765	0.592162	0.454658	0.397699	0.422883	0.343835	0.652003	0.643501	0.77	0.5	0.54	0.46	0.47	0.66	0.56
P76	19	1	0.9	0.8	0.7	0.3	1	0.55	0.5	0.68	0.7	0.5	0.5	0.25	0.85	0.75	0.75	0.61	0.65	1.07232	0.927295	0.991157	0.304693	0.825983	0.835482	0.573203	0.86217	0.640522	0.668964	0.436287	0.618355	0.878032	0.701674	0.97	0.78	0.83	0.37	0.72	0.86	0.64
p80	21	2	0.8	0.25	0.3	0.25	0.8	0.9	0.7	0.57	0.75	0.2	0.3	0.25	0.25	0.95	0.6	0.47	0.52	1.0506	0.315284	0.531808	0.381893	0.684719	0.791648	0.608391	0.821143	0.286757	0.416454	0.436287	0.225513	0.676941	0.643501	0.94	0.3	0.47	0.41	0.46	0.73	0.63
P82	20	2	0.65	0.45	0.55	0.6	0.9	0.55	0.4	0.59	0.5	0.5	0.2	0.5	0.65	0.6	1	0.56	0.58	0.937744	0.546401	0.789565	0.566469	0.670093	0.639206	0.463648	0.640522	0.573203	0.344857	0.785398	0.465134	0.609037	1.00685	0.79	0.56	0.57	0.68	0.57	0.62	0.74
P83	21	2	0.8	0.4	0.45	0.15	0.95	0.55	0.5	0.54	0.5	0.6	0.35	0.25	0.6	0.25	0.95	0.5	0.52	1.0506	0.569677	0.735314	0.180259	0.637158	0.618423	0.523599	0.785398	0.735314	0.586439	0.436287	0.360062	0.303442	0.957282	0.92	0.65	0.66	0.31	0.5	0.46	0.74
P85	27	2	0.8	0.65	0.85	0.45	1	0.9	0.7	0.76	0.7	0.35	0.6	0.55	0.75	0.75	0.9	0.66	0.71	1.0506	0.813538	1.05944	0.494216	0.955317	1.1768	0.75204	0.829901	0.468836	0.799686	0.688119	0.659058	0.774528	0.864297	0.94	0.64	0.93	0.59	0.81	0.98	0.81
p86	19	2	0.7	0.45	0.25	0.2	0.6	0.7	0.4	0.47	0.75	0.1	0.1	0.25	0.35	0.9	0.8	0.46	0.47	0.775397	0.592162	0.523599	0.179853	0.478197	0.597108	0.542639	0.821143	0.225513	0.225513	0.406378	0.294916	0.612591	0.797399	0.8	0.41	0.37	0.29	0.39	0.6	0.67
P87	25	2	0.85	0.25	0.65	0.5	0.7	0.9	0.7	0.65	0.7	0.35	0.45	0.25	0.3	1	1	0.58	0.61	0.978239	0.523599	0.937744	0.555121	0.633052	0.909753	0.620348	0.730744	0.49149	0.735314	0.523599	0.283535	0.785398	0.955317	0.85	0.51	0.84	0.54	0.46	0.85	0.79
P88	21	2	0.95	0.6	0.2	0.25	0.95	0.8	0.3	0.58	0.45	0.2	0.25	0.25	0.6	0.7	0.7	0.45	0.51	1.13324	0.799686	0.321751	0.274601	0.714927	0.697855	0.57964	0.652003	0.463648	0.328632	0.381893	0.402149	0.532668	0.80119	0.89	0.63	0.33	0.33	0.56	0.62	0.69
P89	19	2	0.95	0.55	0.6	0.4	0.75	0.65	0.5	0.63	0.5	0.4	0.5	0.25	0.55	0.7	0.95	0.55	0.59	1.08839	0.688119	0.799686	0.422883	0.735314	0.730022	0.463648	0.739881	0.569677	0.668964	0.436287	0.422395	0.633052	0.8163	0.91	0.63	0.73	0.43	0.58	0.68	0.64
P90	21	2	0.6	0.25	0.25	0.2	0.9	0.45	0.65	0.47	0.35	0.1	0.2	0.1	0.9	0.6	0.9	0.45	0.46	0.799686	0.436287	0.473985	0.286757	0.5272	0.44345	0.782457	0.517806	0.201358	0.373792	0.261157	0.509904	0.566469	0.99591	0.66	0.32	0.42	0.27	0.52	0.5	0.89
P91	20	2	0.5	0.2	0.3	0.25	0.75	0.35	0.4	0.39	0.4	0.1	0.35	0.25	0.65	0.6	0.6	0.42	0.41	0.785398	0.261157	0.353742	0.259394	0.5932	0.367295	0.338616	0.542639	0.15878	0.305984	0.343835	0.581586	0.542639	0.542639	0.66	0.21	0.33	0.3	0.59	0.45	0.44
P92	21	2	0.85	0.5	0.3	0.4	0.95	0.85	0.55	0.63	0.7	0.3	0.45	0.35	0.35	0.8	0.85	0.54	0.59	1.05944	0.739881	0.531808	0.401023	0.786787	0.820612	0.599571	0.829901	0.463648	0.619892	0.586439	0.280358	0.61003	0.944908	0.94	0.6	0.58	0.49	0.53	0.72	0.77
p93	21	2	0.9	0.6	0.35	0.6	0.65	0.8	0.5	0.63	0.75	0.35	0.15	0.55	0.4	0.8	0.8	0.54	0.59	1.07232	0.643501	0.586439	0.542639	0.651183	0.818756	0.573203	0.821143	0.517806	0.397699	0.639206	0.30718	0.660576	0.927295	0.95	0.58	0.49	0.59	0.48	0.74	0.75
P94	20	2	0.7	0.7	0.2	0.5	0.75	0.8	0.3	0.56	0.7	0.25	0.15	0.2	0.3	0.95	0.85	0.49	0.53	0.86217	0.89887	0.411517	0.453961	0.634689	0.684719	0.397699	0.829901	0.473985	0.277406	0.273061	0.256345	0.660134	0.915109	0.85	0.69	0.34	0.36	0.45	0.67	0.66
P96	19	2	0.6	0.55	0.65	0.45	0.9	0.75	0.35	0.61	0.35	0.45	0.35	0.4	0.65	0.6	0.85	0.52	0.56	0.799686	0.662283	0.813538	0.423322	0.700374	0.821143	0.517806	0.468836	0.592162	0.49149	0.569677	0.459273	0.521606	0.978239	0.63	0.63	0.65	0.5	0.58	0.67	0.75
P97	20	2	0.75	0.4	0.25	0.15	0.9	0.65	0.7	0.54	0.45	0.55	0.1	0	0.65	0.65	0.8	0.46	0.5	0.848062	0.569677	0.473985	0.203665	0.619892	0.651183	0.75204	0.619892	0.618423	0.225513	0	0.414916	0.707584	0.684719	0.73	0.59	0.35	0.1	0.52	0.68	0.72
P98	19	2	0.9	0.35	0.35	0.25	0.85	0.6	0.55	0.55	0.85	0.45	0.25	0.25	0.4	0.85	0.85	0.56	0.55	0.935649	0.468836	0.49149	0.343835	0.723116	0.57964	0.526001	0.888204	0.689817	0.274601	0.473985	0.36588	0.675045	0.978239	0.91	0.58	0.38	0.41	0.54	0.63	0.75
p99	22	2	0.75	0.6	0.3	0.3	0.85	0.65	0.55	0.57	0.7	0.5	0.35	0.25	0.85	0.75	0.8	0.6	0.59	0.950127	0.643501	0.494216	0.381275	0.644803	0.651183	0.599571	0.75204	0.555121	0.5489	0.523599	0.580776	0.848062	0.96278	0.85	0.6	0.52	0.45	0.61	0.75	0.78

## Sheet: Study2
Participant	ListenerGroup(1=NonStressed)	Sex(1=female)	Age	StressScore1	StressScore2	StressScore3	AngerRecognition	DisgustRecognition	FearRecognition	HappyRecognition	NeutralRecognition	SadRecognition	SurpriseRecognition	HuAnger	HuDisgust	HuFear	HuHappiness	HuNeutral	HuSadness	HuSurprise
01Npe	1	1	20	2.5		4.5	0.85	0.55	0.325	0.35	0.6	0.775	0.775	0.996491	0.702257	0.53969	0.468836	0.46716	0.671927	0.937036
02Ppe	2	2	19	2.5	4	2	0.675	0.225	0.525	0.225	0.775	0.725	0.75	0.791648	0.466765	0.744728	0.282834	0.536371	0.723259	0.796763
05Npe	1	1	20	3		3.5	0.775	0.375	0.575	0.475	0.55	0.65	0.825	0.871803	0.40053	0.836529	0.541252	0.582364	0.651183	0.754776
06Ppe	2	1	18	0	15	0	0.7	0.575	0.4	0.25	0.575	0.725	0.825	0.879899	0.794052	0.660576	0.335975	0.456718	0.646103	0.780398
07Npe	1	1	20	8		7.5	0.8	0.35	0.45	0.15	0.7	0.7	0.725	0.96278	0.47976	0.652003	0.256345	0.528832	0.69321	0.646103
08Ppe	2	1	18	1	11	4	0.575	0.375	0.3	0.55	0.725	0.7	0.725	0.775212	0.418888	0.426887	0.628553	0.580029	0.711213	0.732641
09Npe	1	1	19	4.5		4.5	0.725	0.7	0.25	0.6	0.65	0.85	0.675	0.904915	0.815145	0.381893	0.65309	0.620421	0.7299	0.777965
11Npp	1	1	18	3.5		3	0.625	0.2	0.6	0.525	0.525	0.825	0.825	0.864431	0.35845	0.799686	0.530953	0.451137	0.746801	0.808965
12Ppe	2	2	19	1.5	12	2.5	0.6	0.2	0.5	0.3	0.6	0.75	0.525	0.861694	0.273061	0.668964	0.373792	0.41899	0.672369	0.595894
13Npe	1	1	18	8		6.5	0.575	0.275	0.45	0.225	0.475	0.725	0.65	0.726093	0.399447	0.670093	0.31575	0.384958	0.615901	0.554307
15Npe	1	2	19	3		2	0.85	0.225	0.45	0.3	0.875	0.65	0.675	0.929612	0.423322	0.689817	0.406752	0.573591	0.730022	0.764998
16Ppe	2	1	18	1.5	5	1	0.5	0.3	0.425	0.375	0.875	0.825	0.8	0.785398	0.373792	0.6268	0.505361	0.66711	0.799079	0.750825
17Npe	1	1	19	4.5		6.5	0.675	0.45	0.675	0.525	0.8	0.7	0.75	0.855155	0.53654	0.837767	0.678332	0.711799	0.684719	0.764115
18Ppe	2	1	21	4.5	8	7	0.8	0.75	0.55	0.5	0.675	0.925	0.8	0.927295	0.950127	0.769395	0.62762	0.740965	0.828706	0.807855
19Npe	1	1	19	8		10	0.7	0.525	0.3	0.3	0.875	0.7	0.65	0.991157	0.678332	0.494216	0.347743	0.626856	0.661043	0.754824
20Ppe	2	1	20	2	10	13.5	0.675	0.4	0.475	0.275	0.65	0.75	0.7	0.791648	0.448774	0.580549	0.379881	0.564746	0.679342	0.75204
22Ppe	2	1	18	0	10	14.5	0.5	0.375	0.225	0.4	0.7	0.9	0.6	0.76158	0.5173	0.323828	0.417084	0.576329	0.754945	0.625546
23Npp	1	1	20	2		2.5	0.8	0.625	0.725	0.4	0.6	0.75	0.8	0.982343	0.685373	0.824541	0.55566	0.601264	0.735314	0.830139
24Ppe	2	1	18	0	15	11.5	0.65	0.325	0.275	0.475	0.65	0.725	0.825	0.848902	0.491058	0.465728	0.550317	0.52618	0.627457	0.780398
25Npp	1	2	18	3.5		6	0.625	0.075	0.475	0.475	0.9	0.575	0.675	0.864431	0.118865	0.660134	0.516548	0.63136	0.587857	0.740965
27Npe	1	2	19	1.5		1.5	0.4	0.175	0.275	0.275	0.425	0.45	0.75	0.542639	0.227891	0.323137	0.410439	0.398428	0.397699	0.555121
29Npe	1	1	19	1		1	0.55	0.575	0.175	0.65	0.6	0.975	0.625	0.769395	0.698239	0.431606	0.587548	0.617123	0.779229	0.665346
30Ppe	2	1	19	4.5	8.5	4.5	0.475	0.425	0.525	0.325	0.7	0.625	0.85	0.695136	0.512948	0.638959	0.453628	0.536589	0.614539	0.830743
31Npe	1	1	18	4		4	0.8	0.625	0.325	0.425	0.625	0.85	0.8	0.895817	0.758871	0.581586	0.567573	0.545721	0.723116	0.895817
32Ppe	2	1	18	4.5	9	8	0.65	0.575	0.25	0.2	0.7	0.675	0.625	0.889725	0.698239	0.371204	0.26691	0.536589	0.648182	0.573964
34Ppe	2	2		2.5	6.5	8	0.35	0.125	0.325	0.125	0.825	0.45	0.675	0.608391	0.266673	0.521899	0.165601	0.451517	0.501875	0.764998
35Npe	1	1	18	10.5		8.5	0.65	0.45	0.55	0.5	0.75	0.825	0.725	0.889725	0.652003	0.733453	0.546705	0.618116	0.746801	0.811034
36Ppe	2	1	19	8.5	12.5	6	0.675	0.625	0.625	0.225	0.725	0.7	0.5	0.729796	0.64701	0.744913	0.288594	0.673826	0.711213	0.546705
38Ppe	2	1	18	0.5	10	5.5	0.5	0.075	0.125	0.175	0.9	0.575	0.625	0.785398	0.131941	0.25268	0.250086	0.541403	0.552599	0.614539
39Npe	1	2	18	0.5		0.5	0.775	0.625	0.4	0.325	0.775	0.775	0.625	0.9984	0.864431	0.584824	0.432975	0.592674	0.665605	0.744913
40Ppe	2	1	19	0	9	12.5	0.65	0.5	0.325	0.275	0.675	0.775	0.875	0.868539	0.563943	0.521899	0.483448	0.523203	0.706563	0.842339
41Npe	1	1	18	2.5		5.5	0.675	0.525	0.225	0.425	0.725	0.725	0.675	0.873761	0.72626	0.323828	0.495151	0.566485	0.689131	0.6722
42Ppe	2	1	21	2	6	7.5	0.575	0.525	0.35	0.1	0.675	0.725	0.85	0.836529	0.638959	0.532668	0.176324	0.478385	0.646103	0.875684
43Npe	1	1	18	10		7	0.55	0.7	0.425	0.4	0.55	0.7	0.7	0.769395	0.775397	0.664486	0.422883	0.432083	0.653692	0.829901
46Ppe	2	1	18	2	8	3.5	0.6	0.65	0.475	0.35	0.7	0.65	0.775	0.78195	0.659632	0.60375	0.468836	0.602669	0.620421	0.844255
47Npe	1	2	18	2		1.5	0.8	0.675	0.2	0.375	0.45	0.95	0.875	0.881335	0.729796	0.463648	0.55899	0.567888	0.748184	0.77935
48Ppe	2	1	20	0	7.5	0	0.25	0.25	0.225	0.175	0.65	0.45	0.625	0.473985	0.27884	0.376237	0.232882	0.414916	0.501875	0.545721
50Ppe	2	1		2.5	10.5	8.5	0.5	0.3	0.325	0.175	0.625	0.675	0.825	0.668964	0.373792	0.453628	0.325207	0.440339	0.663893	0.746801
51Npe	1	1	19	7		4.5	0.7	0.55	0.325	0.3	0.65	0.775	0.75	0.879899	0.674822	0.53969	0.381275	0.517722	0.659461	0.834256
52Ppe	2	1	18	1	12.5	3.5	0.85	0.425	0.375	0.5	0.75	0.575	0.825	0.888204	0.55524	0.55899	0.516529	0.679342	0.587857	0.891186
53Npe	1	1	19	9.5		8.5	0.45	0.475	0.275	0.5	0.875	0.625	0.725	0.689817	0.559858	0.449831	0.573203	0.652826	0.600061	0.74241
